# Supplementary material for: Microbial population dynamics in response to Pectobacterium atrosepticum infection in potato tubers
Source: PubMed Central journal article supplement (PMC4484245; doi:10.1038/srep11606), 2015-06-29
Supplement: srep11606-s1.pdf [file srep11606-s1.pdf]

## **Microbial population dynamics in response to *Pectobacterium atrosepticum* infection in potato tubers**

**Viia Kõiv\*<sup>1</sup>, Märt Roosaare<sup>1</sup>, Eve Vedler<sup>1</sup>, Paula Ann Kivistik<sup>2</sup>, Kristel Toppi<sup>1</sup>, David W. Schryer<sup>3</sup>, Mairo Remm<sup>1</sup>, Tanel Tenson<sup>3</sup>, Andres Mäe<sup>1</sup>**

*Institute of Molecular and Cell Biology, University of Tartu, 23 Riia Street, Tartu 51010, Estonia<sup>1</sup>*

*Estonian Genome Center, University of Tartu, Riia 23 B, 51010 Tartu, Estonia<sup>2</sup>*

*Institute of Technology, University of Tartu, 1 Nooruse Street, Tartu 50411, Estonia<sup>3</sup>*

E-mail: [viia.koiv@ut.ee](mailto:viia.koiv@ut.ee)

## Supplemental Materials:

**Supplemental info.** Technical aspects of potato var. “Ants” cultivation.

**Supplemental Data.** OUTs generated based on sequencing reads of Experiment 2.

**Supplemental Figure S1.** Heatmaps of Experiment 1.

**Supplemental Figure S2.** Phylogenetic tree of cultivable bacteria based on the 16S rRNA gene sequence comparison.

**Potato cultivar „Ants“ 2012:**

Cultivation area 0.5 ha. Planted Basic seeds 2000kg/ha.

Mineral soil, loam

Preceding crops: 2009 summer wheat, 2010 rape, 2011 summer wheat.

Seed dressing: Monceren G, 0.6 l/ha.

Planting time: 17.05. 2012, harvesting 06.09.2012, crop yield 26.0 t/ha.

Fertilizer: Cropcare 8-11-23 800kg/ha 10.05.2012

Plant protection:

1. 21.06. 2012 Titus 30 g/ha+Mistral 300 g/ha+Actara 80 g/ha
2. 09.07.2012 Dithane 2 kg/ha+ Decis 0.15 l/ha+Kemiwett 0.15 l/ha
3. 17.07.2012 Leimay 0.5 l/ha+Actara 60 g/ha+Kemiwett 0.15 l/ha
4. 24.07. 2012 Infinito 1.6 l/ha
5. 11.08.2012 Ranman 0.2 l/ha+Ranman Aktivaator 0.15 l/ha+Decis 0.15 l/ha+Kemiwett 0.15 l/ha
6. 13.08.2012 Sunoco E11 oil 4,
7. 17.08.2012 Reglone Super 2.0 l/ha

**Potato cultivar „Ants“ 2013:**

Cultivation area 0.5 ha. Planted Basic seeds 5000 kg/ha

Mineral soil, loam

Preceding crops: 2010 barley, 2011 barley, 2012 rape.

Seeds not dressed.

Planting time: 27.05. 2012, harvesting 05.09.2012, crop yield 29.0 t/ha.

Fertilizer: Cropcare 11-11-21 800kg/ha 09.05.2012

Plant protection:

1. 19.06. 2013 Titus 30 g/ha+Mistral 300 g/ha+ Decis 0.15 l/ha
2. 01.07.2013 Dithane 2 kg/ha+ Fastac 0.15 l/ha+Titus 30 g/ha
3. 09.07.2013 Infinito 1.6 l/ha+Decis Mega 0.15 l/ha
4. 10.07.2013 Sunoco E11/3
5. 18.07.2013 Dithane 2.0 kg/ha+ Fastac 0.15 l/ha
6. 24.07.2013 Sunoco E11/3 4.0 l/ha
7. 29.07.2013 Orwego 0.8 l/ha + Kemiwett 0,075 l/ha
8. 06.08.2013 Orwego 0.8 l/ha+ Kemiwett 0,075 l/ha
9. 13.08. 2013 Reglone Super 2.5 l/ha+ Kemiwett 0,075 l

**Supplemental info. Technical aspects of potato var. “Ants” cultivation.**

A

| OTU              | K1 | K2 | K3 | K4 | K5 | K6 | 2d2   | 2d6   | 2d7   | 2d10  | 2d11  | 2d12  | 2d13  | 8d1   | 8d3   | 8d8   | 8d11  | 8d12  | 8d13  |
|------------------|----|----|----|----|----|----|-------|-------|-------|-------|-------|-------|-------|-------|-------|-------|-------|-------|-------|
| Bosea            | 1  | 0  | 1  | 0  | 0  | 0  | 0     | 0     | 0     | 1     | 0     | 1     | 0     | 14    | 4     | 1     | 217   | 19    | 13    |
| Consensus156     | 1  | 0  | 1  | 0  | 0  | 0  | 0     | 0     | 0     | 1     | 0     | 1     | 0     | 14    | 4     | 1     | 217   | 19    | 13    |
| Planococcaceae   | 0  | 0  | 0  | 0  | 0  | 0  | 0     | 0     | 0     | 0     | 0     | 0     | 0     | 0     | 0     | 0     | 0     | 0     | 7     |
| Consensus437     | 0  | 0  | 0  | 0  | 0  | 0  | 0     | 0     | 0     | 0     | 0     | 0     | 0     | 0     | 0     | 0     | 0     | 0     | 7     |
| Methylobacillus  | 0  | 0  | 0  | 0  | 0  | 0  | 0     | 0     | 0     | 0     | 0     | 0     | 0     | 29    | 1     | 0     | 0     | 77    | 0     |
| Consensus242     | 0  | 0  | 0  | 0  | 0  | 0  | 0     | 0     | 0     | 0     | 0     | 0     | 0     | 29    | 1     | 0     | 0     | 77    | 0     |
| Pantoea          | 0  | 0  | 0  | 0  | 0  | 19 | 134   | 438   | 1770  | 246   | 38833 | 768   | 2     | 0     | 43    | 44    | 85    | 16    | 29    |
| Consensus273     | 0  | 0  | 0  | 0  | 0  | 0  | 1     | 0     | 7     | 0     | 74    | 4     | 0     | 0     | 1     | 0     | 0     | 0     | 0     |
| Consensus194     | 0  | 0  | 0  | 0  | 0  | 0  | 0     | 5     | 40    | 0     | 133   | 5     | 0     | 0     | 0     | 0     | 0     | 0     | 0     |
| Consensus40      | 0  | 0  | 0  | 0  | 0  | 2  | 18    | 52    | 165   | 18    | 5043  | 64    | 0     | 0     | 8     | 4     | 12    | 3     | 3     |
| Consensus15      | 0  | 0  | 0  | 0  | 0  | 17 | 115   | 381   | 1558  | 228   | 33583 | 695   | 2     | 0     | 34    | 40    | 73    | 13    | 26    |
| Bacillus         | 0  | 0  | 0  | 0  | 0  | 0  | 4044  | 439   | 7976  | 4813  | 305   | 186   | 168   | 63    | 28    | 94    | 33    | 140   | 29    |
| Consensus436     | 0  | 0  | 0  | 0  | 0  | 0  | 0     | 0     | 7     | 0     | 0     | 0     | 0     | 0     | 0     | 0     | 0     | 0     | 0     |
| Consensus407     | 0  | 0  | 0  | 0  | 0  | 0  | 1     | 0     | 8     | 10    | 0     | 1     | 0     | 0     | 0     | 0     | 0     | 0     | 0     |
| Consensus405     | 0  | 0  | 0  | 0  | 0  | 0  | 0     | 0     | 20    | 0     | 0     | 1     | 0     | 0     | 0     | 0     | 0     | 0     | 0     |
| Consensus151     | 0  | 0  | 0  | 0  | 0  | 0  | 0     | 4     | 0     | 0     | 0     | 1     | 0     | 58    | 22    | 88    | 0     | 140   | 0     |
| Consensus105     | 0  | 0  | 0  | 0  | 0  | 0  | 206   | 159   | 95    | 189   | 23    | 1     | 22    | 5     | 0     | 0     | 6     | 0     | 0     |
| Consensus45      | 0  | 0  | 0  | 0  | 0  | 0  | 3     | 4     | 3450  | 5     | 173   | 52    | 77    | 0     | 3     | 0     | 11    | 0     | 29    |
| Consensus26      | 0  | 0  | 0  | 0  | 0  | 0  | 3834  | 272   | 4396  | 4609  | 109   | 130   | 69    | 0     | 3     | 6     | 16    | 0     | 0     |
| Pectobacterium   | 9  | 2  | 8  | 2  | 2  | 3  | 922   | 2525  | 3701  | 750   | 1143  | 1269  | 181   | 2967  | 1704  | 2174  | 10137 | 5432  | 10108 |
| Consensus370     | 0  | 0  | 0  | 0  | 0  | 0  | 0     | 0     | 0     | 0     | 0     | 0     | 0     | 0     | 1     | 1     | 0     | 0     | 30    |
| Consensus353     | 0  | 0  | 0  | 0  | 0  | 0  | 0     | 14    | 8     | 0     | 1     | 5     | 0     | 0     | 2     | 2     | 0     | 7     | 0     |
| Consensus348     | 0  | 0  | 0  | 0  | 0  | 0  | 0     | 0     | 1     | 0     | 2     | 2     | 0     | 17    | 7     | 3     | 2     | 6     | 0     |
| Consensus325     | 0  | 0  | 0  | 0  | 0  | 0  | 3     | 11    | 3     | 4     | 0     | 16    | 0     | 0     | 0     | 0     | 2     | 10    | 1     |
| Consensus321     | 0  | 0  | 0  | 0  | 0  | 0  | 0     | 4     | 19    | 2     | 2     | 0     | 0     | 0     | 1     | 2     | 0     | 21    | 0     |
| Consensus312     | 0  | 0  | 0  | 0  | 0  | 0  | 4     | 1     | 1     | 3     | 0     | 1     | 0     | 2     | 9     | 14    | 14    | 8     | 0     |
| Consensus293     | 0  | 0  | 0  | 0  | 0  | 0  | 2     | 22    | 10    | 0     | 0     | 6     | 0     | 5     | 4     | 12    | 0     | 7     | 0     |
| Consensus211     | 0  | 0  | 0  | 0  | 0  | 0  | 18    | 28    | 17    | 15    | 16    | 12    | 0     | 10    | 2     | 17    | 9     | 12    | 1     |
| Consensus46      | 7  | 2  | 5  | 1  | 0  | 1  | 537   | 227   | 139   | 383   | 399   | 134   | 26    | 332   | 343   | 194   | 562   | 364   | 117   |
| Consensus29      | 2  | 0  | 0  | 0  | 2  | 2  | 261   | 2176  | 3499  | 206   | 676   | 1063  | 38    | 244   | 160   | 571   | 121   | 2291  | 17    |
| Consensus17      | 0  | 0  | 3  | 1  | 0  | 0  | 97    | 42    | 4     | 137   | 47    | 30    | 117   | 2357  | 1175  | 1358  | 9427  | 2706  | 9942  |
| Agromyces        | 0  | 0  | 0  | 0  | 0  | 0  | 0     | 0     | 0     | 0     | 0     | 1     | 0     | 43    | 1     | 0     | 17    | 47    | 107   |
| Consensus177     | 0  | 0  | 0  | 0  | 0  | 0  | 0     | 0     | 0     | 0     | 0     | 1     | 0     | 43    | 1     | 0     | 17    | 47    | 107   |
| Massilia         | 0  | 0  | 0  | 0  | 0  | 0  | 6     | 628   | 6     | 1     | 44    | 117   | 0     | 44    | 16    | 1     | 33    | 1     | 4     |
| Consensus426     | 0  | 0  | 0  | 0  | 0  | 0  | 0     | 8     | 0     | 0     | 1     | 0     | 0     | 1     | 0     | 0     | 0     | 0     | 0     |
| Consensus382     | 0  | 0  | 0  | 0  | 0  | 0  | 1     | 2     | 4     | 1     | 0     | 16    | 0     | 5     | 0     | 0     | 0     | 0     | 0     |
| Consensus91      | 0  | 0  | 0  | 0  | 0  | 0  | 5     | 618   | 2     | 0     | 43    | 101   | 0     | 38    | 16    | 1     | 33    | 1     | 4     |
| Domibacillus     | 0  | 0  | 0  | 0  | 0  | 0  | 0     | 14    | 0     | 0     | 0     | 0     | 0     | 0     | 0     | 0     | 0     | 0     | 0     |
| Consensus419     | 0  | 0  | 0  | 0  | 0  | 0  | 0     | 14    | 0     | 0     | 0     | 0     | 0     | 0     | 0     | 0     | 0     | 0     | 0     |
| Dyadobacter      | 0  | 0  | 0  | 0  | 0  | 0  | 2     | 0     | 0     | 1     | 0     | 0     | 0     | 25    | 0     | 3     | 48    | 1     | 0     |
| Consensus371     | 0  | 0  | 0  | 0  | 0  | 0  | 2     | 0     | 0     | 1     | 0     | 0     | 0     | 21    | 0     | 3     | 4     | 1     | 0     |
| Consensus327     | 0  | 0  | 0  | 0  | 0  | 0  | 0     | 0     | 0     | 0     | 0     | 0     | 0     | 4     | 0     | 0     | 44    | 0     | 0     |
| Devosia          | 0  | 1  | 5  | 0  | 0  | 8  | 1     | 1     | 1     | 0     | 0     | 1     | 0     | 190   | 300   | 8     | 263   | 125   | 45    |
| Consensus174     | 0  | 1  | 2  | 0  | 0  | 7  | 1     | 1     | 1     | 0     | 0     | 1     | 0     | 44    | 59    | 7     | 66    | 24    | 7     |
| Consensus102     | 0  | 0  | 3  | 0  | 0  | 1  | 0     | 0     | 0     | 0     | 0     | 0     | 0     | 146   | 241   | 1     | 197   | 101   | 38    |
| Enterobacter     | 70 | 7  | 39 | 20 | 0  | 31 | 1E+05 | 44712 | 15594 | 1E+05 | 24556 | 34240 | 36124 | 2E+05 | 36066 | 23571 | 2E+05 | 32517 | 3E+05 |
| Consensus221     | 0  | 0  | 0  | 0  | 0  | 0  | 1     | 22    | 0     | 0     | 1     | 0     | 0     | 7     | 11    | 20    | 14    | 14    | 41    |
| Consensus2       | 70 | 7  | 39 | 20 | 0  | 31 | 1E+05 | 44690 | 15594 | 1E+05 | 24555 | 34240 | 36124 | 2E+05 | 36055 | 23551 | 2E+05 | 32503 | 3E+05 |
| Stenotrophomonas | 6  | 0  | 1  | 0  | 0  | 53 | 13184 | 19429 | 10356 | 17044 | 2762  | 15735 | 2256  | 46991 | 12470 | 65563 | 67384 | 16689 | 6761  |
| Consensus417     | 0  | 0  | 0  | 0  | 0  | 0  | 2     | 1     | 1     | 0     | 0     | 4     | 0     | 0     | 5     | 1     | 1     | 0     | 0     |
| Consensus384     | 0  | 0  | 0  | 0  | 0  | 0  | 5     | 3     | 5     | 0     | 0     | 5     | 0     | 5     | 3     | 1     | 1     | 0     | 0     |
| Consensus343     | 0  | 0  | 0  | 0  | 0  | 0  | 0     | 0     | 0     | 0     | 0     | 0     | 0     | 8     | 0     | 0     | 13    | 20    | 0     |
| Consensus341     | 0  | 0  | 0  | 0  | 0  | 0  | 7     | 2     | 2     | 6     | 0     | 2     | 0     | 3     | 0     | 6     | 0     | 14    | 0     |
| Consensus334     | 0  | 0  | 0  | 0  | 0  | 1  | 8     | 0     | 0     | 1     | 0     | 1     | 0     | 0     | 10    | 4     | 2     | 17    | 0     |
| Consensus317     | 0  | 0  | 0  | 0  | 0  | 0  | 1     | 0     | 0     | 0     | 0     | 1     | 0     | 7     | 7     | 11    | 17    | 7     | 2     |
| Consensus304     | 0  | 0  | 0  | 0  | 0  | 0  | 1     | 2     | 17    | 5     | 0     | 0     | 0     | 1     | 2     | 16    | 1     | 13    | 4     |
| Consensus268     | 0  | 0  | 0  | 0  | 0  | 0  | 0     | 22    | 26    | 1     | 0     | 8     | 1     | 1     | 2     | 22    | 0     | 7     | 0     |
| Consensus219     | 0  | 0  | 0  | 0  | 0  | 2  | 13    | 2     | 0     | 16    | 1     | 11    | 0     | 23    | 9     | 30    | 25    | 2     | 3     |
| Consensus216     | 0  | 0  | 0  | 0  | 0  | 0  | 0     | 0     | 0     | 0     | 0     | 2     | 0     | 18    | 0     | 0     | 86    | 35    | 1     |
| Consensus148     | 0  | 0  | 0  | 0  | 0  | 0  | 0     | 0     | 0     | 0     | 0     | 1     | 0     | 18    | 0     | 0     | 44    | 0     | 273   |
| Consensus116     | 0  | 0  | 0  | 0  | 0  | 0  | 15    | 110   | 170   | 10    | 6     | 45    | 0     | 34    | 19    | 147   | 0     | 94    | 0     |
| Consensus85      | 0  | 0  | 0  | 0  | 0  | 0  | 44    | 68    | 455   | 54    | 1     | 1     | 3     | 6     | 12    | 72    | 91    | 261   | 29    |
| Consensus66      | 0  | 0  | 1  | 0  | 0  | 3  | 85    | 164   | 3     | 106   | 4     | 100   | 9     | 22    | 544   | 85    | 93    | 626   | 19    |
| Consensus59      | 0  | 0  | 0  | 0  | 0  | 0  | 125   | 334   | 258   | 119   | 44    | 336   | 2     | 324   | 142   | 221   | 404   | 83    | 25    |
| Consensus13      | 0  | 0  | 0  | 0  | 0  | 0  | 0     | 0     | 0     | 1     | 2     | 184   | 0     | 3414  | 19    | 26    | 23607 | 7883  | 4205  |
| Consensus6       | 6  | 0  | 0  | 0  | 0  | 47 | 12878 | 18721 | 9419  | 16725 | 2704  | 15034 | 2241  | 43107 | 11696 | 64921 | 42999 | 7627  | 2200  |
| Pelosinus        | 0  | 0  | 0  | 0  | 0  | 0  | 0     | 0     | 0     | 0     | 0     | 0     | 0     | 3     | 2     | 3     | 0     | 138   | 11    |
| Consensus210     | 0  | 0  | 0  | 0  | 0  | 0  | 0     | 0     | 0     | 0     | 0     | 0     | 0     | 3     | 2     | 3     | 0     | 138   | 11    |
| Duganella        | 0  | 0  | 0  | 0  | 0  | 0  | 4     | 13    | 0     | 1     | 0     | 22    | 3     | 2     | 0     | 0     | 6     | 0     | 0     |
| Consensus322     | 0  | 0  | 0  | 0  | 0  | 0  | 4     | 13    | 0     | 1     | 0     | 22    | 3     | 2     | 0     | 0     | 6     | 0     | 0     |

|                           |    |    |    |    |    |     |      |      |      |      |     |     |     |       |       |      |       |       |       |
|---------------------------|----|----|----|----|----|-----|------|------|------|------|-----|-----|-----|-------|-------|------|-------|-------|-------|
| Achromobacter             | 4  | 3  | 14 | 4  | 4  | 7   | 437  | 990  | 1383 | 423  | 472 | 633 | 21  | 17182 | 5350  | 3330 | 12041 | 11348 | 2496  |
| Consensus10               | 4  | 3  | 14 | 4  | 4  | 7   | 437  | 990  | 1383 | 423  | 472 | 633 | 21  | 17182 | 5350  | 3330 | 12041 | 11348 | 2496  |
| Zymophilus                | 0  | 0  | 0  | 0  | 0  | 0   | 0    | 0    | 0    | 0    | 0   | 0   | 0   | 0     | 18    | 0    | 0     | 0     | 0     |
| Consensus410              | 0  | 0  | 0  | 0  | 0  | 0   | 0    | 0    | 0    | 0    | 0   | 0   | 0   | 0     | 18    | 0    | 0     | 0     | 0     |
| Comamonas                 | 16 | 0  | 6  | 0  | 0  | 1   | 5890 | 883  | 1    | 6029 | 779 | 809 | 537 | 22470 | 22882 | 2823 | 75072 | 1E+05 | 99595 |
| Consensus400              | 0  | 0  | 0  | 0  | 0  | 0   | 0    | 0    | 0    | 0    | 0   | 0   | 0   | 0     | 7     | 0    | 9     | 1     | 5     |
| Consensus380              | 0  | 0  | 0  | 0  | 0  | 0   | 8    | 0    | 0    | 7    | 0   | 0   | 0   | 8     | 1     | 0    | 4     | 1     | 0     |
| Consensus254              | 0  | 0  | 0  | 0  | 0  | 0   | 0    | 0    | 0    | 0    | 0   | 0   | 0   | 2     | 21    | 0    | 18    | 34    | 23    |
| Consensus237              | 0  | 0  | 0  | 0  | 0  | 0   | 7    | 0    | 0    | 6    | 0   | 0   | 0   | 30    | 11    | 0    | 23    | 22    | 12    |
| Consensus185              | 0  | 0  | 0  | 0  | 0  | 0   | 0    | 0    | 0    | 0    | 0   | 0   | 0   | 0     | 0     | 17   | 180   | 0     | 0     |
| Consensus23               | 10 | 0  | 0  | 0  | 0  | 0   | 0    | 0    | 0    | 0    | 1   | 0   | 1   | 661   | 14682 | 203  | 35    | 580   | 0     |
| Consensus8                | 2  | 0  | 2  | 0  | 0  | 0   | 5863 | 20   | 0    | 5982 | 637 | 441 | 140 | 18147 | 2841  | 841  | 31752 | 2424  | 8251  |
| Consensus5                | 4  | 0  | 4  | 0  | 0  | 1   | 12   | 863  | 1    | 34   | 141 | 368 | 396 | 3622  | 5319  | 1762 | 43051 | 1E+05 | 91304 |
| Shinella                  | 0  | 0  | 0  | 0  | 0  | 1   | 1    | 3    | 5    | 0    | 0   | 5   | 0   | 4     | 0     | 0    | 3     | 4     | 0     |
| Consensus391              | 0  | 0  | 0  | 0  | 0  | 1   | 1    | 3    | 5    | 0    | 0   | 5   | 0   | 4     | 0     | 0    | 3     | 4     | 0     |
| Lysinibacillus            | 0  | 0  | 0  | 0  | 0  | 0   | 0    | 0    | 0    | 4    | 19  | 3   | 0   | 0     | 0     | 4    | 369   | 14444 | 5400  |
| Consensus432              | 0  | 0  | 0  | 0  | 0  | 0   | 0    | 0    | 0    | 0    | 0   | 1   | 0   | 0     | 0     | 0    | 0     | 7     | 0     |
| Consensus379              | 0  | 0  | 0  | 0  | 0  | 0   | 0    | 0    | 0    | 0    | 0   | 0   | 0   | 0     | 0     | 0    | 0     | 29    | 0     |
| Consensus345              | 0  | 0  | 0  | 0  | 0  | 0   | 0    | 0    | 0    | 0    | 0   | 0   | 0   | 0     | 0     | 0    | 0     | 0     | 41    |
| Consensus284              | 0  | 0  | 0  | 0  | 0  | 0   | 0    | 0    | 0    | 0    | 0   | 0   | 0   | 0     | 0     | 0    | 0     | 80    | 0     |
| Consensus154              | 0  | 0  | 0  | 0  | 0  | 0   | 0    | 0    | 0    | 0    | 0   | 0   | 0   | 0     | 0     | 0    | 0     | 0     | 284   |
| Consensus144              | 0  | 0  | 0  | 0  | 0  | 0   | 0    | 0    | 0    | 0    | 0   | 0   | 0   | 0     | 0     | 0    | 368   | 0     | 0     |
| Consensus42               | 0  | 0  | 0  | 0  | 0  | 0   | 0    | 0    | 0    | 2    | 0   | 2   | 0   | 0     | 0     | 0    | 1     | 0     | 5075  |
| Consensus25               | 0  | 0  | 0  | 0  | 0  | 0   | 0    | 0    | 0    | 2    | 19  | 0   | 0   | 0     | 0     | 4    | 0     | 14328 | 0     |
| Paracoccus                | 0  | 0  | 0  | 0  | 0  | 0   | 0    | 12   | 0    | 0    | 0   | 0   | 0   | 35    | 0     | 0    | 75    | 0     | 1     |
| Consensus413              | 0  | 0  | 0  | 0  | 0  | 0   | 0    | 12   | 0    | 0    | 0   | 0   | 0   | 0     | 0     | 0    | 4     | 0     | 0     |
| Consensus241              | 0  | 0  | 0  | 0  | 0  | 0   | 0    | 0    | 0    | 0    | 0   | 0   | 0   | 35    | 0     | 0    | 71    | 0     | 1     |
| Enterobacteriaceae        | 0  | 0  | 0  | 0  | 0  | 0   | 838  | 452  | 199  | 595  | 96  | 268 | 34  | 2874  | 431   | 749  | 2296  | 697   | 1124  |
| Consensus435              | 0  | 0  | 0  | 0  | 0  | 0   | 0    | 0    | 2    | 0    | 0   | 0   | 0   | 0     | 0     | 2    | 3     | 1     | 0     |
| Consensus378              | 0  | 0  | 0  | 0  | 0  | 0   | 1    | 6    | 1    | 0    | 0   | 0   | 0   | 4     | 3     | 4    | 0     | 10    | 0     |
| Consensus326              | 0  | 0  | 0  | 0  | 0  | 0   | 4    | 0    | 0    | 4    | 0   | 1   | 0   | 16    | 1     | 11   | 5     | 3     | 3     |
| Consensus289              | 0  | 0  | 0  | 0  | 0  | 0   | 1    | 27   | 2    | 0    | 16  | 6   | 0   | 3     | 5     | 4    | 2     | 8     | 1     |
| Consensus196              | 0  | 0  | 0  | 0  | 0  | 0   | 24   | 22   | 26   | 5    | 5   | 13  | 2   | 12    | 13    | 8    | 0     | 43    | 5     |
| Consensus175              | 0  | 0  | 0  | 0  | 0  | 0   | 14   | 5    | 0    | 6    | 2   | 3   | 0   | 96    | 14    | 22   | 37    | 10    | 10    |
| Consensus126              | 0  | 0  | 0  | 0  | 0  | 0   | 31   | 31   | 24   | 18   | 6   | 30  | 0   | 92    | 17    | 137  | 87    | 31    | 0     |
| Consensus54               | 0  | 0  | 0  | 0  | 0  | 0   | 763  | 340  | 142  | 561  | 48  | 212 | 28  | 316   | 98    | 92   | 365   | 28    | 19    |
| Consensus37               | 0  | 0  | 0  | 0  | 0  | 0   | 0    | 21   | 2    | 1    | 19  | 3   | 4   | 2335  | 280   | 469  | 1797  | 563   | 1086  |
| Ensifer                   | 0  | 1  | 0  | 2  | 0  | 0   | 1    | 14   | 0    | 0    | 0   | 3   | 0   | 6     | 1     | 0    | 8     | 8     | 9     |
| Consensus319              | 0  | 1  | 0  | 2  | 0  | 0   | 1    | 14   | 0    | 0    | 0   | 3   | 0   | 6     | 1     | 0    | 8     | 8     | 9     |
| Buttiauxella              | 0  | 0  | 0  | 0  | 0  | 0   | 14   | 16   | 1    | 10   | 1   | 1   | 0   | 50    | 12    | 1    | 18    | 1     | 3     |
| Consensus223              | 0  | 0  | 0  | 0  | 0  | 0   | 14   | 16   | 1    | 10   | 1   | 1   | 0   | 50    | 12    | 1    | 18    | 1     | 3     |
| Rhodococcus               | 0  | 0  | 0  | 0  | 0  | 0   | 0    | 0    | 0    | 0    | 0   | 0   | 0   | 0     | 0     | 0    | 5     | 87    | 0     |
| Consensus259              | 0  | 0  | 0  | 0  | 0  | 0   | 0    | 0    | 0    | 0    | 0   | 0   | 0   | 0     | 0     | 0    | 5     | 87    | 0     |
| Rhizobium                 | 0  | 2  | 26 | 0  | 0  | 122 | 555  | 2001 | 1610 | 627  | 247 | 531 | 223 | 8195  | 3611  | 1774 | 4469  | 3338  | 2360  |
| Consensus333              | 0  | 0  | 0  | 0  | 0  | 0   | 1    | 3    | 0    | 1    | 2   | 0   | 0   | 0     | 0     | 0    | 30    | 7     | 0     |
| Consensus309              | 0  | 0  | 0  | 0  | 0  | 0   | 0    | 2    | 4    | 0    | 0   | 2   | 0   | 14    | 29    | 0    | 1     | 4     | 2     |
| Consensus142              | 0  | 0  | 0  | 0  | 0  | 0   | 24   | 12   | 75   | 56   | 2   | 9   | 1   | 77    | 9     | 5    | 87    | 16    | 3     |
| Consensus140              | 0  | 0  | 0  | 0  | 0  | 0   | 2    | 19   | 16   | 0    | 2   | 16  | 0   | 29    | 226   | 5    | 16    | 49    | 15    |
| Consensus112              | 0  | 0  | 0  | 0  | 0  | 0   | 1    | 8    | 0    | 1    | 0   | 1   | 0   | 5     | 1     | 380  | 129   | 155   | 11    |
| Consensus104              | 0  | 0  | 0  | 0  | 0  | 0   | 15   | 118  | 125  | 14   | 17  | 85  | 22  | 24    | 44    | 31   | 197   | 13    | 11    |
| Consensus38               | 0  | 1  | 14 | 0  | 0  | 121 | 147  | 428  | 846  | 122  | 58  | 104 | 14  | 1177  | 802   | 363  | 823   | 466   | 501   |
| Consensus21               | 0  | 1  | 12 | 0  | 0  | 1   | 365  | 1411 | 544  | 433  | 166 | 314 | 186 | 6869  | 2500  | 990  | 3186  | 2628  | 1817  |
| Propionibacterium         | 21 | 12 | 17 | 56 | 33 | 37  | 9    | 21   | 61   | 18   | 17  | 27  | 3   | 25    | 8     | 4    | 4     | 12    | 15    |
| Consensus138              | 21 | 12 | 17 | 56 | 33 | 37  | 9    | 21   | 61   | 18   | 17  | 27  | 3   | 25    | 8     | 4    | 4     | 12    | 15    |
| Clostridium XIVa          | 0  | 0  | 1  | 0  | 0  | 0   | 0    | 2    | 0    | 1    | 0   | 0   | 0   | 247   | 8167  | 2726 | 11410 | 28    | 36665 |
| Consensus402              | 0  | 0  | 0  | 0  | 0  | 0   | 0    | 0    | 0    | 0    | 0   | 0   | 0   | 1     | 0     | 0    | 0     | 0     | 21    |
| Consensus52               | 0  | 0  | 0  | 0  | 0  | 0   | 0    | 0    | 0    | 0    | 0   | 0   | 0   | 235   | 1     | 2596 | 275   | 26    | 166   |
| Consensus11               | 0  | 0  | 1  | 0  | 0  | 0   | 0    | 2    | 0    | 1    | 0   | 0   | 0   | 11    | 8166  | 130  | 11135 | 2     | 36478 |
| Variovorax                | 1  | 2  | 14 | 4  | 0  | 40  | 14   | 30   | 3    | 11   | 1   | 6   | 0   | 454   | 22    | 3    | 443   | 35    | 1     |
| Consensus86               | 1  | 2  | 14 | 4  | 0  | 40  | 14   | 30   | 3    | 11   | 1   | 6   | 0   | 454   | 22    | 3    | 443   | 35    | 1     |
| Phyllobacterium           | 0  | 0  | 17 | 0  | 0  | 0   | 3    | 5    | 4    | 0    | 0   | 1   | 0   | 79    | 25    | 0    | 11    | 2     | 0     |
| Consensus213              | 0  | 0  | 17 | 0  | 0  | 0   | 3    | 5    | 4    | 0    | 0   | 1   | 0   | 79    | 25    | 0    | 11    | 2     | 0     |
| Sphingobium               | 0  | 0  | 9  | 0  | 0  | 6   | 3    | 24   | 15   | 5    | 3   | 26  | 0   | 35    | 0     | 0    | 78    | 0     | 0     |
| Consensus279              | 0  | 0  | 9  | 0  | 0  | 6   | 1    | 17   | 0    | 0    | 2   | 2   | 0   | 12    | 0     | 0    | 35    | 0     | 0     |
| Consensus226              | 0  | 0  | 0  | 0  | 0  | 0   | 2    | 7    | 15   | 5    | 1   | 24  | 0   | 23    | 0     | 0    | 43    | 0     | 0     |
| Clostridium sensu stricto | 0  | 0  | 0  | 0  | 0  | 0   | 0    | 0    | 0    | 17   | 47  | 0   | 1   | 11    | 0     | 313  | 1     | 0     | 0     |
| Consensus425              | 0  | 0  | 0  | 0  | 0  | 0   | 0    | 0    | 0    | 0    | 0   | 0   | 0   | 6     | 0     | 3    | 1     | 0     | 0     |
| Consensus197              | 0  | 0  | 0  | 0  | 0  | 0   | 0    | 0    | 0    | 0    | 0   | 0   | 0   | 5     | 0     | 172  | 0     | 0     | 0     |
| Consensus181              | 0  | 0  | 0  | 0  | 0  | 0   | 0    | 0    | 0    | 17   | 47  | 0   | 1   | 0     | 0     | 138  | 0     | 0     | 0     |
| Microbacterium            | 0  | 0  | 1  | 0  | 0  | 5   | 6    | 30   | 2    | 4    | 3   | 30  | 2   | 128   | 47    | 5    | 256   | 110   | 28    |
| Consensus433              | 0  | 0  | 0  | 0  | 0  | 0   | 0    | 3    | 0    | 0    | 0   | 0   | 1   | 4     | 0     | 0    | 0     | 0     | 0     |
| Consensus418              | 0  | 0  | 0  | 0  | 0  | 1   | 0    | 0    | 0    | 0    | 1   | 0   | 0   | 0     | 0     | 0    | 3     | 10    | 0     |
| Consensus403              | 0  | 0  | 1  | 0  | 0  | 0   | 0    | 0    | 0    | 0    | 0   | 0   | 0   | 3     | 0     | 0    | 17    | 0     | 0     |
| Consensus374              | 0  | 0  | 0  | 0  | 0  | 0   | 0    | 6    | 0    | 0    | 2   | 1   | 0   | 5     | 1     | 0    | 14    | 2     | 0     |

|                    |    |    |    |    |   |     |       |       |       |       |       |       |       |       |       |       |       |       |       |
|--------------------|----|----|----|----|---|-----|-------|-------|-------|-------|-------|-------|-------|-------|-------|-------|-------|-------|-------|
| Consensus245       | 0  | 0  | 0  | 0  | 0 | 0   | 0     | 0     | 0     | 2     | 0     | 2     | 0     | 7     | 1     | 0     | 55    | 33    | 4     |
| Consensus232       | 0  | 0  | 0  | 0  | 0 | 0   | 0     | 0     | 0     | 0     | 0     | 1     | 0     | 9     | 2     | 0     | 87    | 11    | 3     |
| Consensus195       | 0  | 0  | 0  | 0  | 0 | 1   | 5     | 5     | 0     | 2     | 0     | 21    | 0     | 16    | 8     | 0     | 67    | 37    | 19    |
| Consensus193       | 0  | 0  | 0  | 0  | 0 | 3   | 1     | 16    | 2     | 0     | 0     | 5     | 1     | 84    | 35    | 5     | 13    | 17    | 2     |
| Delftia            | 22 | 1  | 4  | 11 | 0 | 1   | 149   | 5880  | 51    | 144   | 204   | 1007  | 169   | 28948 | 25584 | 2E+05 | 97954 | 78201 | 17899 |
| Consensus415       | 0  | 0  | 0  | 0  | 0 | 0   | 0     | 0     | 0     | 0     | 0     | 0     | 0     | 3     | 6     | 0     | 5     | 1     | 1     |
| Consensus390       | 0  | 0  | 0  | 0  | 0 | 0   | 0     | 0     | 0     | 0     | 0     | 0     | 0     | 4     | 2     | 2     | 15    | 1     | 2     |
| Consensus362       | 0  | 0  | 0  | 0  | 0 | 0   | 0     | 1     | 0     | 0     | 0     | 0     | 0     | 1     | 19    | 5     | 7     | 1     | 0     |
| Consensus3         | 22 | 1  | 4  | 11 | 0 | 1   | 149   | 5879  | 51    | 144   | 204   | 1007  | 169   | 28940 | 25557 | 2E+05 | 97927 | 78198 | 17896 |
| Pseudorhodoferax   | 0  | 0  | 0  | 0  | 0 | 0   | 0     | 12    | 1     | 4     | 0     | 4     | 0     | 24    | 3     | 0     | 379   | 11    | 8     |
| Consensus134       | 0  | 0  | 0  | 0  | 0 | 0   | 0     | 12    | 1     | 4     | 0     | 4     | 0     | 24    | 3     | 0     | 379   | 11    | 8     |
| Hermiinimonas      | 0  | 0  | 18 | 0  | 0 | 3   | 0     | 3     | 0     | 5     | 0     | 1     | 0     | 826   | 40    | 67    | 463   | 410   | 80    |
| Consensus421       | 0  | 0  | 2  | 0  | 0 | 0   | 0     | 0     | 0     | 0     | 0     | 0     | 0     | 2     | 1     | 0     | 2     | 6     | 1     |
| Consensus65        | 0  | 0  | 16 | 0  | 0 | 3   | 0     | 3     | 0     | 5     | 0     | 1     | 0     | 824   | 39    | 67    | 461   | 404   | 79    |
| Yersinia           | 0  | 0  | 0  | 0  | 0 | 0   | 1919  | 6728  | 8421  | 3339  | 7     | 1251  | 1711  | 320   | 1     | 282   | 6051  | 3495  | 2857  |
| Consensus16        | 0  | 0  | 0  | 0  | 0 | 0   | 1919  | 6728  | 8421  | 3339  | 7     | 1251  | 1711  | 320   | 1     | 282   | 6051  | 3495  | 2857  |
| Serratia           | 1  | 15 | 6  | 6  | 4 | 5   | 23801 | 4567  | 13261 | 24849 | 5307  | 1077  | 3014  | 4643  | 227   | 31071 | 1619  | 1315  | 4065  |
| Consensus349       | 0  | 0  | 0  | 0  | 0 | 0   | 1     | 3     | 21    | 2     | 2     | 1     | 1     | 0     | 1     | 4     | 0     | 4     | 0     |
| Consensus199       | 0  | 0  | 0  | 0  | 0 | 0   | 49    | 1     | 1     | 20    | 4     | 1     | 0     | 18    | 5     | 1     | 19    | 2     | 51    |
| Consensus161       | 0  | 0  | 0  | 0  | 0 | 0   | 0     | 0     | 0     | 0     | 0     | 50    | 0     | 0     | 0     | 0     | 0     | 0     | 211   |
| Consensus7         | 1  | 15 | 6  | 6  | 4 | 5   | 23751 | 4563  | 13239 | 24827 | 5301  | 1025  | 3013  | 4625  | 221   | 31066 | 1600  | 1309  | 3803  |
| Erythrobacteraceae | 0  | 0  | 0  | 0  | 0 | 0   | 0     | 0     | 0     | 0     | 0     | 0     | 0     | 44    | 0     | 0     | 4     | 0     | 0     |
| Consensus328       | 0  | 0  | 0  | 0  | 0 | 0   | 0     | 0     | 0     | 0     | 0     | 0     | 0     | 44    | 0     | 0     | 4     | 0     | 0     |
| Pedobacter         | 0  | 0  | 0  | 1  | 0 | 88  | 0     | 4     | 1     | 0     | 0     | 0     | 0     | 112   | 6     | 6     | 138   | 66    | 0     |
| Consensus323       | 0  | 0  | 0  | 0  | 0 | 0   | 0     | 0     | 0     | 0     | 0     | 0     | 0     | 15    | 0     | 0     | 0     | 35    | 0     |
| Consensus282       | 0  | 0  | 0  | 1  | 0 | 74  | 0     | 3     | 1     | 0     | 0     | 0     | 0     | 2     | 0     | 0     | 0     | 0     | 0     |
| Consensus270       | 0  | 0  | 0  | 0  | 0 | 3   | 0     | 1     | 0     | 0     | 0     | 0     | 0     | 22    | 2     | 2     | 59    | 0     | 0     |
| Consensus262       | 0  | 0  | 0  | 0  | 0 | 11  | 0     | 0     | 0     | 0     | 0     | 0     | 0     | 7     | 2     | 2     | 66    | 4     | 0     |
| Consensus239       | 0  | 0  | 0  | 0  | 0 | 0   | 0     | 0     | 0     | 0     | 0     | 0     | 0     | 66    | 2     | 2     | 13    | 27    | 0     |
| Sphingobacterium   | 0  | 0  | 0  | 0  | 0 | 9   | 211   | 877   | 6     | 406   | 13    | 115   | 24    | 5759  | 1456  | 6690  | 1793  | 1200  | 2204  |
| Consensus422       | 0  | 0  | 0  | 0  | 0 | 0   | 0     | 0     | 0     | 0     | 1     | 0     | 0     | 4     | 1     | 0     | 1     | 5     | 1     |
| Consensus137       | 0  | 0  | 0  | 0  | 0 | 9   | 0     | 114   | 0     | 2     | 12    | 108   | 24    | 8     | 35    | 2     | 80    | 13    | 0     |
| Consensus136       | 0  | 0  | 0  | 0  | 0 | 0   | 1     | 70    | 0     | 0     | 0     | 0     | 0     | 348   | 0     | 0     | 0     | 0     | 0     |
| Consensus100       | 0  | 0  | 0  | 0  | 0 | 0   | 0     | 0     | 0     | 0     | 0     | 0     | 0     | 1     | 0     | 736   | 6     | 9     | 0     |
| Consensus95        | 0  | 0  | 0  | 0  | 0 | 0   | 0     | 0     | 0     | 0     | 0     | 0     | 0     | 518   | 0     | 2     | 282   | 0     | 0     |
| Consensus81        | 0  | 0  | 0  | 0  | 0 | 0   | 0     | 0     | 0     | 0     | 0     | 0     | 0     | 805   | 0     | 4     | 446   | 2     | 0     |
| Consensus48        | 0  | 0  | 0  | 0  | 0 | 0   | 0     | 0     | 1     | 1     | 0     | 0     | 0     | 2     | 0     | 3549  | 15    | 33    | 1     |
| Consensus39        | 0  | 0  | 0  | 0  | 0 | 0   | 0     | 686   | 5     | 2     | 0     | 5     | 0     | 2239  | 5     | 2113  | 321   | 45    | 5     |
| Consensus32        | 0  | 0  | 0  | 0  | 0 | 0   | 210   | 7     | 0     | 401   | 0     | 2     | 0     | 1834  | 1415  | 284   | 642   | 1093  | 2197  |
| Acinetobacter      | 3  | 0  | 2  | 1  | 0 | 24  | 80678 | 5849  | 243   | 1E+05 | 11827 | 45459 | 3693  | 46464 | 5434  | 215   | 28944 | 12021 | 880   |
| Consensus388       | 0  | 0  | 0  | 1  | 0 | 0   | 0     | 0     | 0     | 0     | 0     | 2     | 0     | 0     | 23    | 0     | 0     | 0     | 0     |
| Consensus4         | 3  | 0  | 2  | 0  | 0 | 24  | 80678 | 5849  | 243   | 1E+05 | 11827 | 45457 | 3693  | 46464 | 5411  | 215   | 28944 | 12021 | 880   |
| Desemzia           | 0  | 0  | 0  | 0  | 0 | 0   | 0     | 0     | 0     | 0     | 0     | 0     | 0     | 0     | 0     | 0     | 0     | 39    | 0     |
| Consensus351       | 0  | 0  | 0  | 0  | 0 | 0   | 0     | 0     | 0     | 0     | 0     | 0     | 0     | 0     | 0     | 0     | 0     | 39    | 0     |
| Janthinobacterium  | 0  | 0  | 0  | 0  | 0 | 0   | 0     | 197   | 0     | 0     | 5     | 0     | 0     | 1     | 0     | 1     | 31    | 2     | 15    |
| Consensus164       | 0  | 0  | 0  | 0  | 0 | 0   | 0     | 197   | 0     | 0     | 5     | 0     | 0     | 1     | 0     | 1     | 31    | 2     | 15    |
| Erwinia            | 0  | 0  | 0  | 0  | 0 | 0   | 2     | 1     | 0     | 4     | 3     | 17    | 7     | 3     | 0     | 41    | 0     | 5     | 19    |
| Consensus247       | 0  | 0  | 0  | 0  | 0 | 0   | 2     | 1     | 0     | 4     | 3     | 17    | 7     | 3     | 0     | 41    | 0     | 5     | 19    |
| Sphingomonadaceae  | 0  | 0  | 1  | 0  | 0 | 0   | 0     | 0     | 0     | 0     | 0     | 0     | 0     | 0     | 0     | 0     | 29    | 0     | 0     |
| Consensus377       | 0  | 0  | 1  | 0  | 0 | 0   | 0     | 0     | 0     | 0     | 0     | 0     | 0     | 0     | 0     | 0     | 29    | 0     | 0     |
| Selenomonadales    | 0  | 0  | 0  | 0  | 0 | 0   | 0     | 0     | 0     | 0     | 0     | 0     | 0     | 0     | 1986  | 15    | 1     | 0     | 0     |
| Consensus291       | 0  | 0  | 0  | 0  | 0 | 0   | 0     | 0     | 0     | 0     | 0     | 0     | 0     | 0     | 70    | 0     | 0     | 0     | 0     |
| Consensus162       | 0  | 0  | 0  | 0  | 0 | 0   | 0     | 0     | 0     | 0     | 0     | 0     | 0     | 0     | 260   | 0     | 0     | 0     | 0     |
| Consensus74        | 0  | 0  | 0  | 0  | 0 | 0   | 0     | 0     | 0     | 0     | 0     | 0     | 0     | 0     | 1656  | 15    | 1     | 0     | 0     |
| Olivibacter        | 0  | 0  | 2  | 0  | 0 | 0   | 0     | 0     | 1     | 0     | 0     | 3     | 0     | 198   | 0     | 0     | 65    | 0     | 0     |
| Consensus158       | 0  | 0  | 2  | 0  | 0 | 0   | 0     | 0     | 1     | 0     | 0     | 3     | 0     | 198   | 0     | 0     | 65    | 0     | 0     |
| Lelliottia         | 0  | 0  | 0  | 0  | 0 | 0   | 98    | 238   | 241   | 66    | 54    | 107   | 4     | 96    | 46    | 65    | 15    | 371   | 93    |
| Consensus330       | 0  | 0  | 0  | 0  | 0 | 0   | 4     | 0     | 0     | 9     | 2     | 6     | 0     | 8     | 1     | 1     | 5     | 1     | 10    |
| Consensus78        | 0  | 0  | 0  | 0  | 0 | 0   | 94    | 238   | 241   | 57    | 52    | 101   | 4     | 88    | 45    | 64    | 10    | 370   | 83    |
| Kluyvera           | 0  | 0  | 0  | 0  | 0 | 0   | 0     | 0     | 0     | 0     | 0     | 878   | 1     | 1     | 1     | 1     | 1     | 0     | 2927  |
| Consensus44        | 0  | 0  | 0  | 0  | 0 | 0   | 0     | 0     | 0     | 0     | 0     | 878   | 1     | 1     | 1     | 1     | 1     | 0     | 2927  |
| Proteobacteria     | 0  | 0  | 2  | 3  | 0 | 8   | 2     | 30    | 13    | 0     | 0     | 28    | 0     | 30    | 6     | 1     | 90    | 45    | 64    |
| Consensus150       | 0  | 0  | 2  | 3  | 0 | 8   | 2     | 30    | 13    | 0     | 0     | 28    | 0     | 30    | 6     | 1     | 90    | 45    | 64    |
| Sphingopyxis       | 0  | 0  | 6  | 1  | 0 | 3   | 1     | 4     | 0     | 1     | 0     | 0     | 0     | 829   | 51    | 5     | 129   | 489   | 70    |
| Consensus76        | 0  | 0  | 6  | 1  | 0 | 3   | 1     | 4     | 0     | 1     | 0     | 0     | 0     | 829   | 51    | 5     | 129   | 489   | 70    |
| Pseudomonas        | 24 | 3  | 18 | 41 | 4 | 325 | 52562 | 3E+05 | 3E+05 | 78641 | 1E+05 | 1E+05 | 47909 | 1E+05 | 17898 | 1E+05 | 5685  | 2E+05 | 47778 |
| Consensus398       | 0  | 0  | 0  | 0  | 0 | 0   | 0     | 0     | 0     | 0     | 0     | 0     | 0     | 0     | 6     | 9     | 0     | 7     | 0     |
| Consensus308       | 0  | 0  | 0  | 0  | 0 | 0   | 3     | 19    | 5     | 2     | 1     | 4     | 0     | 12    | 1     | 10    | 0     | 2     | 0     |
| Consensus307       | 0  | 0  | 0  | 0  | 0 | 0   | 0     | 2     | 0     | 0     | 1     | 0     | 0     | 0     | 0     | 0     | 0     | 0     | 57    |
| Consensus303       | 0  | 0  | 0  | 0  | 0 | 0   | 3     | 11    | 15    | 2     | 8     | 4     | 3     | 0     | 0     | 9     | 0     | 6     | 2     |
| Consensus300       | 0  | 0  | 1  | 0  | 0 | 0   | 6     | 6     | 7     | 4     | 7     | 11    | 0     | 1     | 1     | 0     | 0     | 18    | 2     |
| Consensus280       | 0  | 0  | 0  | 0  | 0 | 1   | 19    | 36    | 0     | 27    | 0     | 0     | 0     | 0     | 0     | 0     | 0     | 0     | 0     |
| Consensus269       | 0  | 0  | 0  | 0  | 0 | 0   | 1     | 18    | 25    | 0     | 9     | 5     | 0     | 17    | 0     | 0     | 0     | 14    | 0     |
| Consensus246       | 0  | 0  | 0  | 0  | 0 | 0   | 6     | 24    | 8     | 12    | 1     | 1     | 0     | 29    | 0     | 20    | 2     | 0     | 0     |

|                   |    |   |    |    |   |     |       |       |       |       |       |       |       |       |       |       |       |       |       |
|-------------------|----|---|----|----|---|-----|-------|-------|-------|-------|-------|-------|-------|-------|-------|-------|-------|-------|-------|
| Consensus190      | 0  | 0 | 0  | 0  | 0 | 5   | 79    | 21    | 3     | 63    | 2     | 3     | 3     | 0     | 0     | 4     | 5     | 0     | 0     |
| Consensus172      | 0  | 0 | 0  | 0  | 0 | 0   | 7     | 8     | 9     | 2     | 2     | 26    | 0     | 33    | 6     | 81    | 0     | 52    | 1     |
| Consensus145      | 0  | 0 | 1  | 0  | 0 | 0   | 1     | 120   | 33    | 0     | 1     | 0     | 0     | 2     | 0     | 155   | 24    | 1     | 28    |
| Consensus111      | 0  | 0 | 0  | 0  | 0 | 1   | 274   | 46    | 38    | 293   | 0     | 32    | 0     | 0     | 5     | 0     | 1     | 5     | 0     |
| Consensus109      | 0  | 0 | 0  | 0  | 0 | 0   | 235   | 75    | 13    | 202   | 19    | 16    | 2     | 79    | 3     | 23    | 33    | 2     | 1     |
| Consensus63       | 0  | 0 | 0  | 0  | 0 | 20  | 728   | 61    | 14    | 883   | 54    | 46    | 210   | 6     | 11    | 4     | 2     | 7     | 3     |
| Consensus50       | 0  | 0 | 0  | 0  | 0 | 0   | 145   | 658   | 925   | 172   | 748   | 538   | 9     | 70    | 42    | 17    | 1     | 162   | 38    |
| Consensus19       | 0  | 0 | 0  | 0  | 0 | 0   | 884   | 5323  | 4145  | 929   | 3026  | 3082  | 42    | 558   | 752   | 374   | 30    | 3651  | 603   |
| Consensus12       | 1  | 1 | 2  | 0  | 0 | 146 | 7782  | 1969  | 264   | 9474  | 5809  | 4329  | 22665 | 77    | 285   | 116   | 47    | 1319  | 356   |
| Consensus9        | 0  | 0 | 2  | 3  | 0 | 37  | 15722 | 5931  | 1567  | 17535 | 1968  | 861   | 1578  | 21836 | 124   | 4515  | 3766  | 461   | 159   |
| Consensus1        | 23 | 2 | 12 | 38 | 4 | 115 | 26667 | 3E+05 | 3E+05 | 49041 | 1E+05 | 1E+05 | 23397 | 79915 | 16662 | 1E+05 | 1774  | 2E+05 | 46528 |
| Raoultella        | 2  | 0 | 0  | 0  | 0 | 0   | 89    | 49    | 13    | 84    | 33    | 54    | 32    | 45    | 763   | 66    | 129   | 312   | 25    |
| Consensus72       | 2  | 0 | 0  | 0  | 0 | 0   | 89    | 49    | 13    | 84    | 33    | 54    | 32    | 45    | 763   | 66    | 129   | 312   | 25    |
| Acidovorax        | 0  | 0 | 2  | 1  | 0 | 222 | 0     | 176   | 0     | 0     | 50    | 1     | 0     | 116   | 455   | 16    | 613   | 39    | 203   |
| Consensus147      | 0  | 0 | 1  | 1  | 0 | 221 | 0     | 2     | 0     | 0     | 0     | 0     | 0     | 6     | 0     | 0     | 106   | 5     | 0     |
| Consensus107      | 0  | 0 | 0  | 0  | 0 | 0   | 0     | 0     | 0     | 0     | 0     | 0     | 0     | 105   | 62    | 5     | 472   | 34    | 28    |
| Consensus93       | 0  | 0 | 1  | 0  | 0 | 1   | 0     | 174   | 0     | 0     | 50    | 1     | 0     | 5     | 393   | 11    | 35    | 0     | 175   |
| Veillonellaceae   | 0  | 0 | 1  | 0  | 0 | 0   | F     | 0     | 0     | 0     | 0     | 0     | 0     | 0     | 8554  | 95    | 1     | 0     | 0     |
| Consensus428      | 0  | 0 | 0  | 0  | 0 | 0   | 0     | 0     | 0     | 0     | 0     | 0     | 0     | 0     | 9     | 0     | 0     | 0     | 0     |
| Consensus369      | 0  | 0 | 0  | 0  | 0 | 0   | 0     | 0     | 0     | 0     | 0     | 0     | 0     | 0     | 33    | 0     | 0     | 0     | 0     |
| Consensus320      | 0  | 0 | 0  | 0  | 0 | 0   | 0     | 0     | 0     | 0     | 0     | 0     | 0     | 0     | 53    | 0     | 0     | 0     | 0     |
| Consensus202      | 0  | 0 | 0  | 0  | 0 | 0   | 0     | 0     | 0     | 0     | 0     | 0     | 0     | 0     | 171   | 0     | 0     | 0     | 0     |
| Consensus120      | 0  | 0 | 0  | 0  | 0 | 0   | 0     | 0     | 0     | 0     | 0     | 0     | 0     | 0     | 547   | 0     | 0     | 0     | 0     |
| Consensus33       | 0  | 0 | 1  | 0  | 0 | 0   | 0     | 0     | 0     | 0     | 0     | 0     | 0     | 0     | 7741  | 95    | 1     | 0     | 0     |
| Paenibacillus     | 1  | 0 | 0  | 0  | 0 | 6   | 85    | 1329  | 19    | 91    | 206   | 178   | 35    | 597   | 1565  | 372   | 64    | 1765  | 5321  |
| Consensus427      | 0  | 0 | 0  | 0  | 0 | 0   | 0     | 0     | 0     | 0     | 0     | 0     | 0     | 0     | 0     | 0     | 0     | 4     | 5     |
| Consensus404      | 0  | 0 | 0  | 0  | 0 | 0   | 0     | 0     | 0     | 0     | 0     | 0     | 0     | 0     | 0     | 0     | 0     | 0     | 21    |
| Consensus357      | 0  | 0 | 0  | 0  | 0 | 0   | 1     | 9     | 0     | 0     | 2     | 2     | 0     | 2     | 0     | 3     | 11    | 6     | 0     |
| Consensus295      | 0  | 0 | 0  | 0  | 0 | 0   | 0     | 0     | 0     | 0     | 0     | 0     | 0     | 0     | 6     | 0     | 0     | 2     | 59    |
| Consensus271      | 0  | 0 | 0  | 0  | 0 | 0   | 0     | 0     | 0     | 0     | 0     | 0     | 0     | 0     | 0     | 0     | 0     | 88    | 0     |
| Consensus209      | 0  | 0 | 0  | 0  | 0 | 0   | 0     | 0     | 0     | 0     | 0     | 0     | 0     | 0     | 4     | 0     | 0     | 0     | 153   |
| Consensus176      | 0  | 0 | 0  | 0  | 0 | 0   | 0     | 0     | 0     | 0     | 0     | 0     | 0     | 0     | 216   | 0     | 2     | 0     | 0     |
| Consensus143      | 0  | 0 | 0  | 0  | 0 | 0   | 0     | 7     | 0     | 0     | 0     | 0     | 0     | 0     | 2     | 0     | 0     | 0     | 367   |
| Consensus119      | 0  | 0 | 0  | 0  | 0 | 0   | 0     | 0     | 0     | 0     | 0     | 0     | 0     | 0     | 167   | 3     | 1     | 52    | 337   |
| Consensus117      | 0  | 0 | 0  | 0  | 0 | 0   | 0     | 0     | 0     | 0     | 1     | 39    | 3     | 108   | 60    | 78    | 12    | 299   | 48    |
| Consensus88       | 0  | 0 | 0  | 0  | 0 | 1   | 24    | 538   | 9     | 40    | 86    | 34    | 14    | 70    | 28    | 42    | 11    | 28    | 4     |
| Consensus75       | 0  | 0 | 0  | 0  | 0 | 5   | 60    | 686   | 10    | 51    | 114   | 103   | 18    | 194   | 132   | 121   | 29    | 92    | 30    |
| Consensus34       | 1  | 0 | 0  | 0  | 0 | 0   | 0     | 89    | 0     | 0     | 3     | 0     | 0     | 3     | 1170  | 123   | 0     | 1194  | 4297  |
| Microbacteriaceae | 0  | 0 | 0  | 0  | 0 | 0   | 0     | 0     | 0     | 0     | 0     | 0     | 0     | 0     | 3     | 0     | 9     | 3     | 0     |
| Consensus416      | 0  | 0 | 0  | 0  | 0 | 0   | 0     | 0     | 0     | 0     | 0     | 0     | 0     | 0     | 3     | 0     | 9     | 3     | 0     |
| Brevundimonas     | 0  | 0 | 0  | 0  | 0 | 4   | 0     | 428   | 75    | 0     | 0     | 19    | 0     | 359   | 228   | 4     | 757   | 318   | 801   |
| Consensus55       | 0  | 0 | 0  | 0  | 0 | 4   | 0     | 428   | 75    | 0     | 0     | 19    | 0     | 359   | 228   | 4     | 757   | 318   | 801   |
| Rhodobacteraceae  | 0  | 0 | 0  | 0  | 0 | 0   | 0     | 0     | 0     | 0     | 0     | 0     | 0     | 12    | 65    | 0     | 1     | 5     | 180   |
| Consensus160      | 0  | 0 | 0  | 0  | 0 | 0   | 0     | 0     | 0     | 0     | 0     | 0     | 0     | 12    | 65    | 0     | 1     | 5     | 180   |
| Oxalicibacterium  | 0  | 0 | 3  | 0  | 0 | 0   | 0     | 6     | 18    | 0     | 0     | 18    | 2     | 39    | 6     | 0     | 10    | 32    | 121   |
| Consensus163      | 0  | 0 | 3  | 0  | 0 | 0   | 0     | 6     | 18    | 0     | 0     | 18    | 2     | 39    | 6     | 0     | 10    | 32    | 121   |
| Leucobacter       | 0  | 0 | 0  | 0  | 0 | 0   | 0     | 0     | 0     | 0     | 0     | 0     | 0     | 14    | 0     | 0     | 3     | 33    | 0     |
| Consensus324      | 0  | 0 | 0  | 0  | 0 | 0   | 0     | 0     | 0     | 0     | 0     | 0     | 0     | 14    | 0     | 0     | 3     | 33    | 0     |
| Chryseobacterium  | 2  | 0 | 0  | 3  | 0 | 21  | 3130  | 8989  | 313   | 3993  | 3609  | 2939  | 628   | 20938 | 1100  | 3866  | 20185 | 6868  | 13823 |
| Consensus337      | 0  | 0 | 0  | 0  | 0 | 0   | 0     | 0     | 0     | 0     | 0     | 0     | 0     | 6     | 0     | 1     | 37    | 0     | 0     |
| Consensus302      | 0  | 0 | 0  | 0  | 0 | 0   | 2     | 30    | 0     | 4     | 2     | 4     | 0     | 1     | 0     | 5     | 13    | 2     | 0     |
| Consensus267      | 0  | 0 | 0  | 0  | 0 | 0   | 8     | 31    | 1     | 4     | 2     | 45    | 0     | 0     | 0     | 0     | 0     | 0     | 0     |
| Consensus258      | 0  | 0 | 0  | 0  | 0 | 2   | 36    | 0     | 0     | 34    | 0     | 0     | 22    | 0     | 0     | 0     | 0     | 0     | 0     |
| Consensus191      | 0  | 0 | 0  | 0  | 0 | 0   | 0     | 0     | 0     | 0     | 0     | 0     | 0     | 87    | 0     | 0     | 0     | 27    | 74    |
| Consensus129      | 0  | 0 | 0  | 0  | 0 | 0   | 5     | 16    | 0     | 1     | 107   | 11    | 0     | 22    | 311   | 2     | 0     | 0     | 0     |
| Consensus128      | 0  | 0 | 0  | 0  | 0 | 0   | 0     | 3     | 0     | 0     | 0     | 0     | 0     | 0     | 0     | 0     | 484   | 0     | 0     |
| Consensus98       | 0  | 0 | 0  | 0  | 0 | 0   | 1     | 0     | 0     | 4     | 0     | 780   | 0     | 0     | 0     | 0     | 2     | 1     | 0     |
| Consensus49       | 0  | 0 | 0  | 0  | 0 | 5   | 103   | 304   | 0     | 114   | 2     | 136   | 0     | 2917  | 1     | 12    | 6     | 0     | 0     |
| Consensus47       | 0  | 0 | 0  | 0  | 0 | 0   | 130   | 219   | 83    | 167   | 2532  | 46    | 7     | 209   | 0     | 0     | 12    | 205   | 0     |
| Consensus22       | 1  | 0 | 0  | 0  | 0 | 0   | 1220  | 128   | 204   | 2052  | 433   | 511   | 24    | 58    | 568   | 598   | 13020 | 79    | 1     |
| Consensus18       | 1  | 0 | 0  | 3  | 0 | 14  | 1625  | 8258  | 25    | 1612  | 528   | 1406  | 575   | 668   | 219   | 3174  | 6603  | 454   | 40    |
| Consensus14       | 0  | 0 | 0  | 0  | 0 | 0   | 0     | 0     | 0     | 1     | 3     | 0     | 0     | 16970 | 1     | 74    | 8     | 6100  | 13708 |
| Novosphingobium   | 0  | 0 | 0  | 0  | 0 | 0   | 76    | 332   | 9     | 64    | 2     | 52    | 2     | 17    | 0     | 27    | 132   | 1     | 3     |
| Consensus103      | 0  | 0 | 0  | 0  | 0 | 0   | 76    | 332   | 9     | 64    | 2     | 52    | 2     | 17    | 0     | 27    | 132   | 1     | 3     |
| Methylophilus     | 0  | 0 | 0  | 0  | 0 | 0   | 0     | 3     | 0     | 1     | 0     | 0     | 0     | 22    | 0     | 0     | 766   | 0     | 0     |
| Consensus96       | 0  | 0 | 0  | 0  | 0 | 0   | 0     | 3     | 0     | 1     | 0     | 0     | 0     | 22    | 0     | 0     | 766   | 0     | 0     |
| Lachnospiraceae   | 0  | 0 | 0  | 0  | 0 | 0   | 0     | 0     | 0     | 0     | 0     | 0     | 0     | 54    | 0     | 394   | 125   | 116   | 17    |
| Consensus106      | 0  | 0 | 0  | 0  | 0 | 0   | 0     | 0     | 0     | 0     | 0     | 0     | 0     | 54    | 0     | 394   | 125   | 116   | 17    |
| Flavobacterium    | 0  | 0 | 3  | 0  | 1 | 102 | 12    | 3     | 4     | 17    | 15    | 4595  | 0     | 1715  | 14    | 14    | 3419  | 8602  | 2884  |
| Consensus406      | 0  | 0 | 0  | 0  | 0 | 0   | 0     | 2     | 0     | 0     | 0     | 2     | 0     | 5     | 0     | 0     | 4     | 0     | 8     |
| Consensus360      | 0  | 0 | 0  | 0  | 0 | 0   | 0     | 0     | 0     | 0     | 0     | 33    | 0     | 2     | 0     | 0     | 0     | 0     | 0     |
| Consensus359      | 0  | 0 | 0  | 0  | 0 | 0   | 11    | 0     | 0     | 17    | 0     | 0     | 0     | 7     | 0     | 0     | 0     | 0     | 0     |
| Consensus355      | 0  | 0 | 0  | 0  | 1 | 36  | 0     | 0     | 0     | 0     | 0     | 0     | 0     | 0     | 0     | 0     | 0     | 0     | 0     |
| Consensus339      | 0  | 0 | 0  | 0  | 0 | 13  | 0     | 0     | 0     | 0     | 0     | 0     | 0     | 0     | 0     | 1     | 28    | 1     | 0     |

|                   |   |   |   |   |   |    |     |    |    |    |    |      |   |       |     |      |       |      |      |
|-------------------|---|---|---|---|---|----|-----|----|----|----|----|------|---|-------|-----|------|-------|------|------|
| Consensus298      | 0 | 0 | 0 | 0 | 0 | 0  | 0   | 0  | 0  | 0  | 0  | 0    | 0 | 0     | 0   | 0    | 65    | 0    | 0    |
| Consensus287      | 0 | 0 | 3 | 0 | 0 | 53 | 0   | 0  | 0  | 0  | 0  | 2    | 0 | 13    | 0   | 0    | 3     | 1    | 0    |
| Consensus249      | 0 | 0 | 0 | 0 | 0 | 0  | 0   | 0  | 0  | 0  | 0  | 6    | 0 | 32    | 1   | 1    | 42    | 12   | 7    |
| Consensus201      | 0 | 0 | 0 | 0 | 0 | 0  | 0   | 0  | 0  | 0  | 0  | 0    | 0 | 20    | 1   | 0    | 117   | 4    | 29   |
| Consensus183      | 0 | 0 | 0 | 0 | 0 | 0  | 0   | 0  | 0  | 0  | 0  | 0    | 0 | 14    | 0   | 0    | 77    | 80   | 30   |
| Consensus180      | 0 | 0 | 0 | 0 | 0 | 0  | 0   | 0  | 0  | 0  | 0  | 0    | 0 | 0     | 0   | 0    | 9     | 197  | 0    |
| Consensus153      | 0 | 0 | 0 | 0 | 0 | 0  | 0   | 0  | 0  | 0  | 0  | 1    | 0 | 255   | 1   | 3    | 0     | 5    | 32   |
| Consensus69       | 0 | 0 | 0 | 0 | 0 | 0  | 1   | 0  | 4  | 0  | 1  | 1758 | 0 | 0     | 2   | 0    | 13    | 1    | 3    |
| Consensus53       | 0 | 0 | 0 | 0 | 0 | 0  | 0   | 1  | 0  | 0  | 0  | 2793 | 0 | 311   | 0   | 4    | 25    | 38   | 11   |
| Consensus24       | 0 | 0 | 0 | 0 | 0 | 0  | 0   | 0  | 0  | 0  | 14 | 0    | 0 | 1056  | 9   | 5    | 3036  | 8263 | 2764 |
| Arthrobacter      | 0 | 0 | 1 | 0 | 0 | 0  | 56  | 0  | 0  | 80 | 0  | 0    | 0 | 64    | 0   | 0    | 220   | 18   | 13   |
| Consensus131      | 0 | 0 | 1 | 0 | 0 | 0  | 56  | 0  | 0  | 80 | 0  | 0    | 0 | 64    | 0   | 0    | 220   | 18   | 13   |
| Ochrobactrum      | 0 | 0 | 0 | 0 | 0 | 0  | 156 | 12 | 32 | 84 | 32 | 70   | 3 | 11576 | 960 | 3051 | 15946 | 2729 | 1060 |
| Consensus420      | 0 | 0 | 0 | 0 | 0 | 0  | 0   | 0  | 0  | 0  | 0  | 0    | 0 | 3     | 2   | 0    | 2     | 7    | 0    |
| Consensus331      | 0 | 0 | 0 | 0 | 0 | 0  | 0   | 0  | 0  | 0  | 0  | 1    | 0 | 9     | 13  | 0    | 14    | 7    | 2    |
| Consensus297      | 0 | 0 | 0 | 0 | 0 | 0  | 0   | 0  | 0  | 0  | 0  | 0    | 0 | 20    | 3   | 6    | 33    | 3    | 0    |
| Consensus90       | 0 | 0 | 0 | 0 | 0 | 0  | 3   | 0  | 0  | 0  | 0  | 5    | 0 | 222   | 17  | 82   | 445   | 79   | 17   |
| Consensus87       | 0 | 0 | 0 | 0 | 0 | 0  | 53  | 5  | 7  | 38 | 0  | 4    | 0 | 415   | 122 | 2    | 19    | 128  | 162  |
| Consensus28       | 0 | 0 | 0 | 0 | 0 | 0  | 56  | 7  | 21 | 27 | 29 | 22   | 1 | 5699  | 700 | 36   | 3249  | 1240 | 686  |
| Consensus20       | 0 | 0 | 0 | 0 | 0 | 0  | 44  | 0  | 4  | 19 | 3  | 38   | 2 | 5208  | 103 | 2925 | 12184 | 1265 | 193  |
| Flavobacteriaceae | 0 | 0 | 0 | 0 | 0 | 0  | 7   | 0  | 0  | 3  | 0  | 13   | 0 | 9     | 9   | 2    | 8     | 2    | 1    |
| Consensus315      | 0 | 0 | 0 | 0 | 0 | 0  | 7   | 0  | 0  | 3  | 0  | 13   | 0 | 9     | 9   | 2    | 8     | 2    | 1    |

B

| OTU         | K1m | K2m | K4m | K5m | K6m | 2d1m | 2d2m | 2d3m | 2d4m | 2d5m | 5d1m | 5d2m | 5d3m | 5d4m | 5d5m | 8d3m  | 8d4m | 8d5m  | 8d6m | 8d7m  |
|-------------|-----|-----|-----|-----|-----|------|------|------|------|------|------|------|------|------|------|-------|------|-------|------|-------|
| Consensus1  | 0   | 0   | 0   | 0   | 0   | 6    | 3    | 0    | 16   | 7    | 0    | 56   | 9    | 10   | 585  | 7101  | 0    | 2     | 0    | 2E+05 |
| Consensus2  | 0   | 4   | 3   | 2   | 3   | 2    | 0    | 2    | 0    | 0    | 5    | 6    | 129  | 98   | 1279 | 312   | 5    | 859   | 41   | 9     |
| Consensus3  | 0   | 0   | 0   | 0   | 0   | 0    | 2    | 0    | 0    | 0    | 0    | 1    | 8    | 0    | 0    | 0     | 0    | 0     | 0    | 2     |
| Consensus4  | 0   | 0   | 0   | 0   | 0   | 1    | 0    | 0    | 0    | 0    | 0    | 12   | 0    | 0    | 3    | 2     | 0    | 0     | 3    | 2     |
| Consensus6  | 0   | 0   | 0   | 0   | 0   | 0    | 1    | 0    | 0    | 2    | 0    | 1    | 15   | 2    | 8    | 65    | 1    | 15    | 0    | 11764 |
| Consensus7  | 0   | 0   | 0   | 0   | 0   | 0    | 10   | 0    | 3    | 2    | 4    | 8    | 7    | 38   | 17   | 3479  | 5    | 47    | 20   | 8     |
| Consensus9  | 0   | 1   | 0   | 0   | 0   | 25   | 123  | 170  | 14   | 195  | 2    | 9    | 41   | 3347 | 3526 | 3     | 0    | 27    | 7    | 2763  |
| Consensus10 | 0   | 0   | 0   | 10  | 0   | 0    | 9    | 1    | 1    | 5    | 0    | 3    | 2    | 3    | 6    | 113   | 0    | 6     | 0    | 12505 |
| Consensus11 | 0   | 2   | 5   | 0   | 2   | 2    | 0    | 3    | 0    | 0    | 0    | 0    | 2    | 3    | 5    | 10336 | 2    | 3     | 69   | 0     |
| Consensus12 | 6   | 0   | 0   | 0   | 0   | 42   | 2    | 42   | 1    | 0    | 6    | 20   | 152  | 168  | 3084 | 234   | 1    | 4     | 5    | 906   |
| Consensus13 | 0   | 0   | 0   | 0   | 0   | 0    | 0    | 0    | 0    | 0    | 0    | 0    | 0    | 0    | 3    | 0     | 0    | 0     | 0    | 21    |
| Consensus14 | 0   | 0   | 0   | 0   | 0   | 0    | 0    | 0    | 0    | 0    | 0    | 0    | 0    | 0    | 1    | 0     | 0    | 0     | 0    | 0     |
| Consensus15 | 0   | 0   | 0   | 0   | 0   | 2    | 0    | 1    | 1    | 0    | 2    | 0    | 0    | 1    | 3    | 1     | 4    | 10    | 1    | 0     |
| Consensus16 | 0   | 0   | 2   | 2   | 0   | 1    | 0    | 0    | 0    | 4    | 0    | 3    | 430  | 16   | 126  | 263   | 6    | 412   | 0    | 267   |
| Consensus17 | 1   | 3   | 0   | 1   | 0   | 59   | 0    | 26   | 26   | 0    | 48   | 0    | 12   | 34   | 102  | 42183 | 79   | 147   | 43   | 0     |
| Consensus18 | 0   | 0   | 0   | 0   | 0   | 0    | 0    | 0    | 0    | 0    | 0    | 0    | 0    | 0    | 0    | 44    | 0    | 0     | 0    | 0     |
| Consensus19 | 0   | 0   | 0   | 0   | 0   | 1    | 0    | 0    | 1    | 1    | 0    | 1    | 4    | 29   | 15   | 22    | 0    | 0     | 0    | 675   |
| Consensus20 | 0   | 0   | 0   | 0   | 0   | 0    | 0    | 0    | 0    | 0    | 0    | 0    | 0    | 0    | 0    | 0     | 0    | 0     | 0    | 5     |
| Consensus21 | 0   | 1   | 0   | 2   | 1   | 3    | 0    | 0    | 0    | 2    | 13   | 1    | 116  | 7    | 1436 | 29    | 0    | 21    | 0    | 12623 |
| Consensus22 | 0   | 0   | 0   | 0   | 0   | 0    | 0    | 0    | 0    | 0    | 0    | 0    | 0    | 0    | 0    | 0     | 0    | 0     | 2    | 0     |
| Consensus23 | 0   | 0   | 0   | 0   | 0   | 0    | 0    | 0    | 0    | 0    | 0    | 0    | 0    | 0    | 81   | 6     | 0    | 0     | 0    | 0     |
| Consensus25 | 0   | 0   | 0   | 0   | 0   | 2    | 88   | 0    | 20   | 0    | 0    | 0    | 102  | 7    | 0    | 1     | 0    | 0     | 0    | 5     |
| Consensus26 | 0   | 0   | 0   | 0   | 0   | 57   | 29   | 0    | 0    | 43   | 1    | 1    | 0    | 0    | 0    | 0     | 0    | 0     | 0    | 0     |
| Consensus28 | 0   | 0   | 0   | 0   | 0   | 0    | 0    | 0    | 0    | 0    | 0    | 0    | 0    | 0    | 0    | 0     | 0    | 0     | 0    | 0     |
| Consensus29 | 0   | 8   | 0   | 7   | 3   | 478  | 0    | 227  | 243  | 1    | 528  | 3    | 51   | 686  | 483  | 326   | 550  | 216   | 310  | 664   |
| Consensus33 | 0   | 0   | 0   | 0   | 0   | 0    | 0    | 0    | 0    | 0    | 0    | 0    | 0    | 4    | 0    | 0     | 4    | 0     | 0    | 0     |
| Consensus34 | 0   | 0   | 0   | 0   | 0   | 0    | 0    | 0    | 0    | 0    | 0    | 0    | 0    | 0    | 0    | 0     | 0    | 0     | 0    | 0     |
| Consensus37 | 3   | 10  | 1   | 3   | 4   | 4    | 0    | 5    | 1    | 0    | 1    | 0    | 318  | 316  | 316  | 937   | 15   | 5832  | 69   | 0     |
| Consensus38 | 0   | 0   | 0   | 2   | 0   | 0    | 0    | 0    | 0    | 0    | 1    | 0    | 0    | 0    | 5    | 0     | 0    | 0     | 0    | 587   |
| Consensus39 | 0   | 0   | 0   | 0   | 0   | 0    | 0    | 0    | 0    | 0    | 0    | 0    | 0    | 0    | 0    | 0     | 0    | 0     | 1    | 0     |
| Consensus40 | 0   | 0   | 0   | 0   | 0   | 0    | 0    | 0    | 0    | 0    | 0    | 2    | 0    | 0    | 0    | 0     | 0    | 0     | 0    | 36    |
| Consensus42 | 0   | 0   | 0   | 0   | 0   | 0    | 0    | 0    | 0    | 0    | 0    | 0    | 0    | 0    | 0    | 0     | 0    | 0     | 0    | 0     |
| Consensus44 | 0   | 0   | 0   | 1   | 0   | 1    | 0    | 0    | 0    | 0    | 0    | 0    | 0    | 0    | 2    | 12371 | 0    | 1903  | 0    | 0     |
| Consensus45 | 0   | 0   | 0   | 0   | 0   | 0    | 83   | 0    | 4    | 0    | 0    | 1    | 3    | 0    | 52   | 4     | 0    | 0     | 0    | 8     |
| Consensus46 | 0   | 2   | 2   | 7   | 2   | 817  | 40   | 356  | 376  | 31   | 834  | 66   | 36   | 315  | 800  | 282   | 836  | 302   | 480  | 79    |
| Consensus47 | 0   | 0   | 0   | 0   | 0   | 0    | 0    | 0    | 0    | 0    | 0    | 0    | 0    | 0    | 1    | 0     | 0    | 0     | 0    | 2     |
| Consensus50 | 0   | 0   | 0   | 0   | 0   | 6    | 0    | 0    | 0    | 0    | 0    | 1    | 1    | 2    | 64   | 157   | 0    | 0     | 0    | 189   |
| Consensus52 | 0   | 0   | 0   | 0   | 0   | 0    | 0    | 0    | 0    | 0    | 0    | 0    | 0    | 0    | 0    | 0     | 0    | 0     | 0    | 0     |
| Consensus54 | 0   | 8   | 0   | 1   | 1   | 2    | 110  | 2    | 2    | 0    | 5    | 9    | 109  | 84   | 103  | 98    | 78   | 766   | 171  | 7037  |
| Consensus55 | 0   | 0   | 0   | 1   | 0   | 0    | 0    | 0    | 0    | 0    | 0    | 0    | 0    | 0    | 1    | 0     | 0    | 0     | 0    | 0     |
| Consensus59 | 0   | 0   | 0   | 0   | 0   | 0    | 0    | 1    | 0    | 0    | 0    | 0    | 42   | 4    | 4    | 139   | 16   | 21    | 0    | 69    |
| Consensus63 | 0   | 0   | 0   | 0   | 0   | 2    | 245  | 0    | 0    | 3    | 1    | 4    | 23   | 2    | 2028 | 3     | 0    | 0     | 0    | 738   |
| Consensus65 | 0   | 0   | 0   | 0   | 0   | 0    | 0    | 0    | 0    | 0    | 0    | 0    | 0    | 0    | 0    | 0     | 0    | 0     | 0    | 0     |
| Consensus66 | 0   | 8   | 0   | 0   | 0   | 0    | 0    | 0    | 0    | 3    | 0    | 0    | 42   | 4    | 9    | 23    | 206  | 0     | 0    | 1653  |
| Consensus69 | 0   | 3   | 0   | 0   | 0   | 0    | 0    | 0    | 0    | 0    | 0    | 0    | 0    | 0    | 0    | 0     | 0    | 0     | 0    | 0     |
| Consensus72 | 0   | 0   | 6   | 0   | 0   | 0    | 0    | 4    | 0    | 0    | 0    | 0    | 7    | 0    | 64   | 100   | 0    | 53014 | 0    | 0     |
| Consensus74 | 0   | 1   | 0   | 0   | 0   | 0    | 0    | 0    | 0    | 0    | 0    | 0    | 0    | 2    | 0    | 0     | 0    | 0     | 0    | 0     |





|              |   |   |   |   |   |     |    |    |    |     |     |     |     |     |     |     |     |     |    |      |
|--------------|---|---|---|---|---|-----|----|----|----|-----|-----|-----|-----|-----|-----|-----|-----|-----|----|------|
| Consensus273 | 0 | 0 | 0 | 0 | 0 | 0   | 0  | 0  | 0  | 0   | 0   | 2   | 0   | 0   | 0   | 0   | 0   | 0   | 0  | 16   |
| Consensus279 | 0 | 1 | 0 | 0 | 0 | 0   | 0  | 0  | 0  | 0   | 0   | 0   | 0   | 0   | 0   | 0   | 0   | 0   | 0  | 0    |
| Consensus280 | 0 | 0 | 0 | 0 | 0 | 0   | 49 | 2  | 0  | 0   | 0   | 0   | 0   | 1   | 82  | 0   | 0   | 0   | 0  | 0    |
| Consensus282 | 0 | 5 | 0 | 1 | 0 | 0   | 0  | 0  | 0  | 0   | 0   | 3   | 0   | 0   | 4   | 0   | 0   | 0   | 0  | 0    |
| Consensus284 | 0 | 0 | 0 | 1 | 0 | 2   | 0  | 0  | 5  | 0   | 0   | 0   | 8   | 1   | 0   | 0   | 0   | 0   | 0  | 0    |
| Consensus287 | 0 | 2 | 0 | 0 | 0 | 0   | 0  | 0  | 0  | 0   | 0   | 0   | 0   | 0   | 0   | 0   | 0   | 0   | 0  | 0    |
| Consensus289 | 0 | 0 | 0 | 0 | 0 | 141 | 0  | 67 | 86 | 0   | 163 | 0   | 12  | 65  | 139 | 107 | 162 | 115 | 95 | 0    |
| Consensus293 | 0 | 0 | 0 | 0 | 0 | 1   | 1  | 0  | 0  | 0   | 0   | 0   | 18  | 343 | 21  | 13  | 1   | 0   | 0  | 87   |
| Consensus297 | 0 | 0 | 0 | 0 | 0 | 0   | 0  | 0  | 0  | 0   | 0   | 0   | 0   | 0   | 0   | 0   | 0   | 0   | 0  | 1235 |
| Consensus300 | 0 | 0 | 0 | 0 | 0 | 0   | 0  | 0  | 0  | 0   | 0   | 0   | 0   | 0   | 0   | 0   | 0   | 0   | 0  | 2    |
| Consensus302 | 0 | 0 | 0 | 0 | 0 | 0   | 0  | 0  | 0  | 0   | 0   | 1   | 0   | 0   | 0   | 1   | 0   | 0   | 0  | 0    |
| Consensus303 | 0 | 0 | 0 | 0 | 0 | 0   | 0  | 0  | 0  | 0   | 0   | 0   | 0   | 0   | 0   | 2   | 0   | 0   | 0  | 3    |
| Consensus304 | 0 | 1 | 0 | 0 | 0 | 0   | 0  | 0  | 0  | 0   | 0   | 0   | 7   | 0   | 2   | 1   | 0   | 0   | 0  | 0    |
| Consensus307 | 0 | 0 | 0 | 0 | 0 | 0   | 0  | 0  | 0  | 0   | 0   | 0   | 0   | 0   | 5   | 0   | 0   | 0   | 0  | 0    |
| Consensus308 | 0 | 0 | 0 | 0 | 0 | 0   | 0  | 0  | 0  | 0   | 0   | 0   | 0   | 0   | 3   | 20  | 0   | 0   | 0  | 29   |
| Consensus309 | 0 | 0 | 0 | 0 | 0 | 0   | 0  | 0  | 0  | 0   | 0   | 0   | 0   | 0   | 0   | 0   | 0   | 0   | 0  | 38   |
| Consensus312 | 0 | 0 | 0 | 0 | 0 | 0   | 0  | 0  | 0  | 0   | 1   | 0   | 6   | 75  | 12  | 2   | 5   | 0   | 4  | 46   |
| Consensus315 | 0 | 0 | 0 | 0 | 0 | 0   | 0  | 0  | 0  | 0   | 0   | 0   | 0   | 0   | 0   | 0   | 0   | 0   | 0  | 0    |
| Consensus317 | 0 | 0 | 0 | 0 | 0 | 0   | 0  | 0  | 0  | 0   | 0   | 0   | 0   | 0   | 0   | 22  | 0   | 0   | 0  | 87   |
| Consensus319 | 0 | 0 | 0 | 0 | 0 | 1   | 0  | 0  | 0  | 0   | 0   | 0   | 0   | 0   | 0   | 0   | 0   | 0   | 0  | 0    |
| Consensus321 | 0 | 0 | 0 | 0 | 0 | 0   | 0  | 3  | 0  | 0   | 0   | 0   | 14  | 253 | 12  | 7   | 3   | 0   | 1  | 27   |
| Consensus322 | 0 | 0 | 1 | 0 | 0 | 0   | 0  | 0  | 0  | 0   | 0   | 0   | 0   | 0   | 1   | 0   | 0   | 0   | 0  | 0    |
| Consensus324 | 0 | 0 | 0 | 0 | 0 | 0   | 0  | 0  | 0  | 0   | 0   | 0   | 0   | 0   | 0   | 0   | 0   | 0   | 0  | 0    |
| Consensus325 | 0 | 9 | 0 | 5 | 3 | 3   | 3  | 0  | 1  | 1   | 0   | 0   | 12  | 0   | 4   | 44  | 2   | 38  | 1  | 1    |
| Consensus326 | 0 | 0 | 0 | 0 | 0 | 0   | 0  | 0  | 0  | 0   | 1   | 0   | 3   | 1   | 3   | 3   | 0   | 1   | 1  | 1    |
| Consensus327 | 0 | 1 | 0 | 0 | 0 | 0   | 0  | 0  | 0  | 0   | 0   | 0   | 0   | 0   | 0   | 0   | 0   | 0   | 0  | 0    |
| Consensus330 | 0 | 0 | 0 | 0 | 0 | 0   | 0  | 0  | 0  | 0   | 0   | 0   | 0   | 2   | 0   | 0   | 0   | 0   | 0  | 6    |
| Consensus331 | 0 | 0 | 0 | 0 | 0 | 0   | 0  | 0  | 0  | 0   | 0   | 0   | 0   | 0   | 0   | 0   | 0   | 0   | 0  | 0    |
| Consensus333 | 0 | 0 | 0 | 0 | 0 | 0   | 0  | 0  | 0  | 0   | 0   | 0   | 0   | 0   | 1   | 0   | 0   | 0   | 0  | 1    |
| Consensus334 | 0 | 1 | 0 | 0 | 0 | 0   | 0  | 0  | 0  | 0   | 0   | 0   | 1   | 1   | 0   | 0   | 46  | 0   | 0  | 1    |
| Consensus339 | 0 | 0 | 0 | 0 | 0 | 0   | 0  | 0  | 0  | 0   | 0   | 0   | 0   | 0   | 0   | 0   | 0   | 0   | 0  | 0    |
| Consensus341 | 0 | 0 | 0 | 0 | 0 | 0   | 0  | 0  | 0  | 0   | 0   | 14  | 1   | 5   | 2   | 0   | 5   | 0   | 0  | 1    |
| Consensus345 | 0 | 0 | 0 | 0 | 0 | 0   | 0  | 0  | 0  | 0   | 0   | 0   | 0   | 0   | 0   | 0   | 0   | 0   | 0  | 0    |
| Consensus348 | 0 | 0 | 0 | 0 | 0 | 0   | 10 | 0  | 0  | 2   | 0   | 9   | 9   | 11  | 29  | 30  | 5   | 63  | 14 | 523  |
| Consensus349 | 1 | 1 | 0 | 0 | 0 | 0   | 0  | 0  | 0  | 0   | 0   | 0   | 8   | 1   | 2   | 659 | 0   | 25  | 0  | 1    |
| Consensus351 | 0 | 0 | 0 | 0 | 0 | 0   | 0  | 0  | 0  | 0   | 0   | 0   | 0   | 0   | 0   | 0   | 0   | 0   | 0  | 0    |
| Consensus353 | 0 | 0 | 0 | 0 | 0 | 0   | 0  | 0  | 0  | 0   | 0   | 0   | 7   | 60  | 4   | 2   | 0   | 0   | 0  | 1    |
| Consensus355 | 0 | 1 | 0 | 0 | 0 | 0   | 0  | 0  | 0  | 0   | 0   | 0   | 0   | 0   | 0   | 0   | 0   | 0   | 0  | 0    |
| Consensus357 | 0 | 0 | 0 | 0 | 0 | 15  | 1  | 0  | 4  | 161 | 18  | 845 | 0   | 3   | 19  | 5   | 21  | 0   | 0  | 6    |
| Consensus359 | 0 | 0 | 1 | 0 | 0 | 0   | 0  | 0  | 0  | 0   | 0   | 0   | 0   | 0   | 0   | 0   | 0   | 0   | 0  | 0    |
| Consensus362 | 0 | 0 | 0 | 0 | 0 | 0   | 0  | 0  | 0  | 0   | 0   | 0   | 1   | 0   | 0   | 0   | 0   | 0   | 0  | 0    |
| Consensus369 | 0 | 0 | 0 | 0 | 0 | 0   | 0  | 0  | 0  | 0   | 0   | 0   | 0   | 4   | 1   | 0   | 0   | 0   | 0  | 0    |
| Consensus370 | 0 | 0 | 0 | 0 | 0 | 0   | 0  | 0  | 0  | 0   | 0   | 0   | 1   | 0   | 84  | 108 | 0   | 108 | 7  | 2    |
| Consensus374 | 0 | 0 | 0 | 0 | 0 | 0   | 0  | 0  | 0  | 0   | 0   | 0   | 0   | 0   | 0   | 0   | 0   | 0   | 0  | 0    |
| Consensus378 | 0 | 0 | 0 | 0 | 0 | 0   | 0  | 0  | 1  | 0   | 0   | 0   | 232 | 263 | 17  | 30  | 32  | 308 | 47 | 48   |
| Consensus379 | 0 | 0 | 0 | 0 | 0 | 0   | 1  | 0  | 0  | 0   | 0   | 0   | 3   | 0   | 0   | 0   | 0   | 0   | 0  | 0    |
| Consensus384 | 0 | 0 | 0 | 0 | 0 | 0   | 0  | 0  | 0  | 0   | 0   | 0   | 0   | 0   | 0   | 1   | 0   | 0   | 0  | 8    |
| Consensus388 | 0 | 0 | 1 | 6 | 1 | 0   | 0  | 0  | 0  | 0   | 0   | 0   | 0   | 0   | 0   | 0   | 0   | 0   | 0  | 0    |
| Consensus391 | 0 | 0 | 0 | 0 | 0 | 0   | 0  | 0  | 0  | 0   | 0   | 0   | 2   | 0   | 0   | 0   | 1   | 0   | 0  | 2    |
| Consensus398 | 0 | 0 | 0 | 0 | 0 | 0   | 0  | 0  | 0  | 0   | 0   | 0   | 0   | 0   | 0   | 0   | 0   | 0   | 0  | 0    |
| Consensus400 | 0 | 0 | 0 | 0 | 0 | 0   | 0  | 0  | 0  | 0   | 0   | 0   | 0   | 0   | 0   | 0   | 0   | 0   | 0  | 0    |
| Consensus405 | 0 | 0 | 0 | 0 | 0 | 0   | 0  | 0  | 0  | 0   | 0   | 0   | 0   | 0   | 0   | 2   | 0   | 0   | 0  | 0    |
| Consensus406 | 0 | 0 | 0 | 0 | 0 | 0   | 0  | 0  | 0  | 0   | 0   | 0   | 0   | 0   | 1   | 0   | 0   | 0   | 0  | 0    |
| Consensus407 | 0 | 0 | 0 | 0 | 0 | 0   | 1  | 0  | 0  | 0   | 0   | 0   | 0   | 0   | 0   | 0   | 0   | 0   | 0  | 0    |
| Consensus410 | 0 | 0 | 0 | 0 | 0 | 0   | 0  | 0  | 0  | 0   | 0   | 0   | 0   | 0   | 0   | 0   | 0   | 0   | 1  | 0    |
| Consensus417 | 0 | 0 | 0 | 0 | 0 | 0   | 0  | 0  | 0  | 0   | 0   | 0   | 0   | 0   | 0   | 2   | 0   | 1   | 0  | 2    |
| Consensus418 | 0 | 0 | 0 | 0 | 0 | 0   | 0  | 0  | 0  | 0   | 0   | 0   | 0   | 0   | 0   | 0   | 0   | 0   | 0  | 0    |
| Consensus419 | 0 | 0 | 0 | 0 | 0 | 0   | 0  | 0  | 0  | 0   | 0   | 0   | 0   | 0   | 0   | 0   | 0   | 0   | 0  | 0    |
| Consensus420 | 0 | 0 | 0 | 1 | 0 | 0   | 0  | 0  | 0  | 0   | 0   | 0   | 0   | 0   | 0   | 0   | 0   | 0   | 0  | 0    |
| Consensus421 | 0 | 0 | 0 | 0 | 0 | 0   | 0  | 0  | 0  | 0   | 0   | 0   | 0   | 0   | 4   | 0   | 0   | 0   | 0  | 0    |
| Consensus425 | 0 | 0 | 0 | 0 | 0 | 0   | 0  | 0  | 0  | 0   | 0   | 0   | 0   | 0   | 2   | 0   | 0   | 0   | 0  | 0    |
| Consensus426 | 0 | 0 | 0 | 0 | 0 | 0   | 0  | 0  | 0  | 0   | 0   | 0   | 0   | 0   | 0   | 0   | 0   | 0   | 0  | 0    |
| Consensus427 | 0 | 0 | 0 | 0 | 0 | 0   | 0  | 0  | 0  | 0   | 0   | 0   | 0   | 0   | 0   | 0   | 0   | 0   | 0  | 0    |
| Consensus428 | 0 | 0 | 0 | 0 | 0 | 0   | 0  | 0  | 0  | 0   | 0   | 0   | 0   | 1   | 0   | 0   | 0   | 0   | 0  | 0    |
| Consensus432 | 0 | 0 | 0 | 1 | 0 | 2   | 0  | 0  | 13 | 0   | 0   | 0   | 15  | 0   | 0   | 1   | 0   | 0   | 0  | 0    |
| Consensus435 | 0 | 0 | 0 | 0 | 0 | 0   | 0  | 0  | 0  | 0   | 0   | 0   | 0   | 0   | 0   | 7   | 2   | 0   | 0  | 0    |
| Consensus436 | 0 | 0 | 0 | 0 | 0 | 0   | 0  | 0  | 1  | 0   | 0   | 0   | 0   | 0   | 25  | 3   | 0   | 0   | 0  | 0    |

**Supplemental Data. OUTs generated based on sequencing reads of Experiment 2. (A )** Number of OUT reads in Experiment 2. **(B)** Number of OUT reads in Experiment

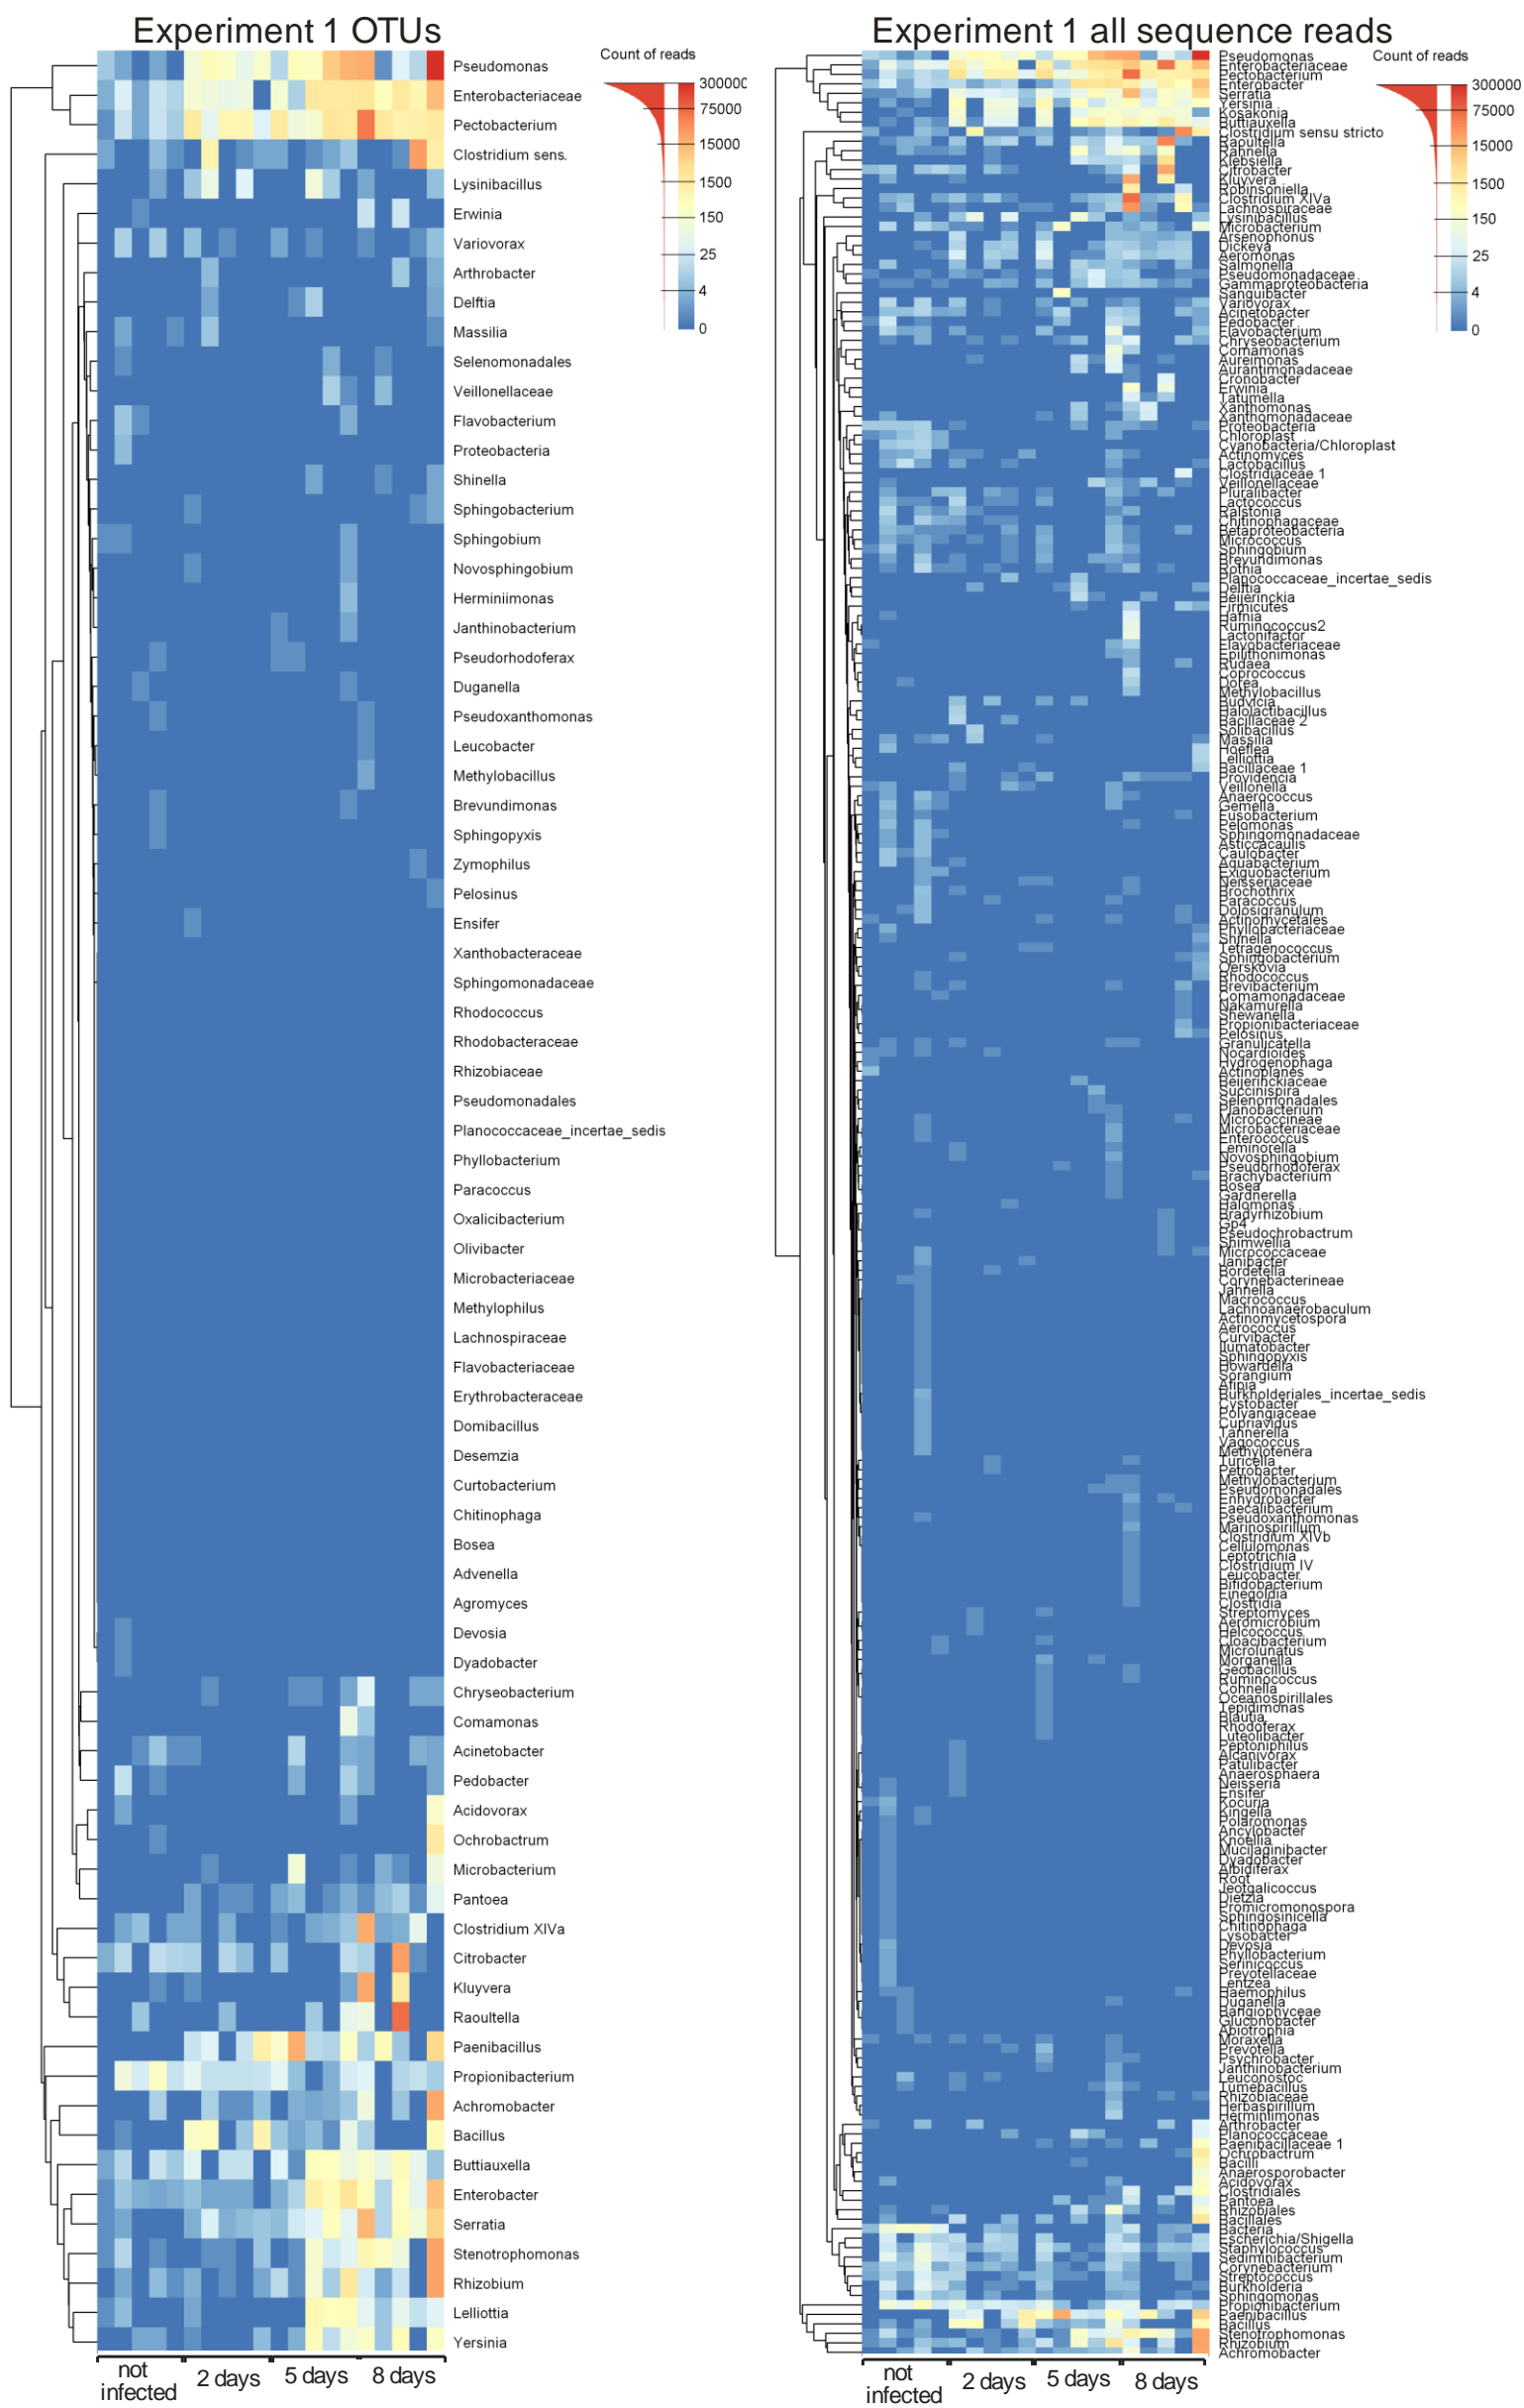

**Supplemental Figure S1. Heatmaps of Experiment 1.** (A) OTU sequences from Experiment 2 were used to cluster all similar sequences from Experiment 1. (B) Counted sequences reads of Experiment 1 classified by the RDP *multiclassifier* were normalized using inverse hyperbolic sine transformation. Heatmaps were made in R using pheatmap (parameters: clustering\_method = average, clustering\_distance = euclidean).

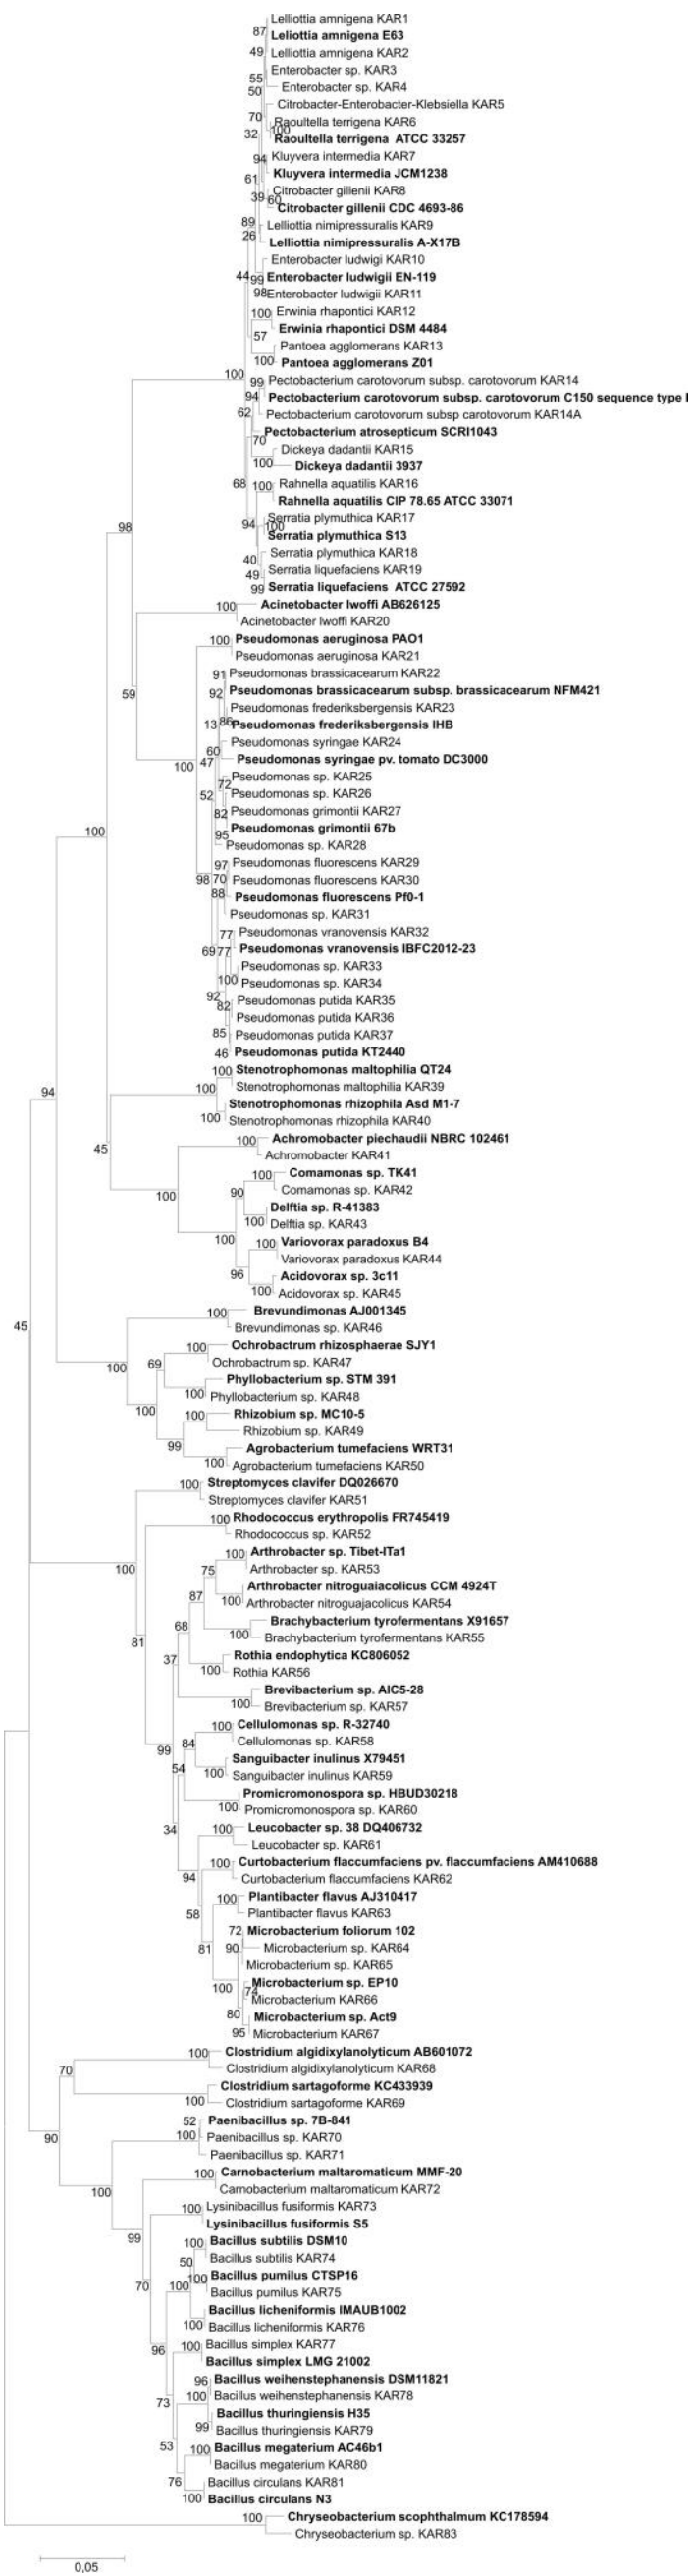

**Supplemental Figure S2. Phylogenetic tree of cultivable bacteria based on the 16S rRNA gene sequence comparison.** The tree was constructed based on the nearly full length 16S rRNA genes of cultivable bacteria and their nearest sequences (bold), as retrieved from the GenBank database.
